# Supplementary material
Source: PubMed Central journal article supplement (PMC6358711)
Supplement: pnas.1814335116.sapp.pdf [file pnas.1814335116.sapp.pdf]

## Supplemental Information

### **Transient receptor potential melastatin 2 governs stress-induced depressive-like behaviors**

Seung Yeon Ko, Sung Eun Wang, Han Kyu Lee, Sungsin Jo, Jinil Han, Seung Hoon Lee, Miyeon Choi, Hye-Ryeong Jo, Jee Young Seo, Sung Jun Jung and Hyeon Son

#### **List of Supplemental Materials**

##### **SI Materials and Methods**

##### **References**

**Table S1.** Statistical parameters

**Table S2.** Experimental schedule for the CUS procedure in mice

**Table S3.** Primary antibodies used in western blotting and immunohistochemistry

**Table S4.** Primer sequences for qPCR

**Table S5.** Demographic information between the subjects with MDD and the controls

**Figure S1.** TRPM2 levels are increased in the hippocampus of patients with MDD

**Figure S2.** Molecular and behavioral characterization of *Trpm2*<sup>-/-</sup> mice

**Figure S3.** Expression of TRPM2 channels in mouse hippocampal and DG neurons

**Figure S4.** TRPM2 modulates neurogenesis, but has no effect on astrocyte differentiation and inflammation in the adult mouse hippocampus

**Figure S5.** TRPM2 alters Cdk5 activity

**Figure S6.** Expression of Cdk5 in cultured hippocampal neurons and protein kinases related to the action of stress or presynaptic regulation in the mouse hippocampal DG

**Figure S7.** TRPM2 deficiency blocks H<sub>2</sub>O<sub>2</sub>-induced p35 cleavage and the decrease in Cdk5-specific phosphorylation

**Figure S8.** TRPM2 mediates the stress-induced ROS response via Cdk5

**Figure S9.** Knockdown of TRPM2 increases Cdk5-specific phosphorylation

**Figure S10.** TRPM2 deficiency increases the expression of synaptic molecules in the hippocampus

**Figure S11.** Knockdown of Cdk5 increases PAR expression

**Figure S12.** Locomotor activities in lenti-shLuc- and lenti-shCdk5-infused mice

**Figure S13.** Knockdown of Cdk5 blocks antidepressant-like behaviors in *Trpm2*<sup>-/-</sup> mice under CUS

**Figure S14.** Schematic diagram

## SI Materials and Methods

**Mice.** TRPM2 heterozygous (*Trpm2*<sup>+/-</sup>) mice were backcrossed into C57BL/6J inbred background over 10 generations. Heterozygous breeders were crossed to generate wild-type (*Trpm2*<sup>+/+</sup>), heterozygous (*Trpm2*<sup>+/-</sup>) and knockout (*Trpm2*<sup>-/-</sup>) littermates, and PCR analysis determined each of the genotypes. All animals were maintained under a 12-h light/dark cycle with *ad libitum* access to food and water. All animal experiments were performed following protocols approved by the Institutional Animal Care and Use Committee of Hanyang University.

**Behavioral Assessments.** Mice were placed to the testing room 2 h before the start of each behavioral test and acclimated to the room conditions. All tests were conducted during the dark cycle of animal housing and in random order. After individual test session, the apparatus was cleaned with 70 % alcohol to remove any odor and trace of the previously tested mouse.

**Locomotor Activity Test (LMA).** Mice were placed in a corner of a white plastic box (50 × 50 × 20 cm) to initiate test session, and their movements were recorded for 5 min with a web camera (HD C310, Logitech, Switzerland) fixed over the apparatus. Total locomotor activity was measured using an ANY-maze video tracking system (Stoelting Co., IL, USA).

**Sucrose Consumption Test (SCT).** Mice were habituated for 48 h to 1 % (w/v) sucrose solution by providing the sucrose solution as the only drinking fluid. After 12–18 h water deprivation, the amount of sucrose solution consumed for 1 h was measured by comparing the bottle weight before and after the test.

**Novelty Suppressed Feeding Test (NSFT).** Three food pellets were placed in the center of a white plastic box (50 × 50 × 20 cm). After 24 h food deprivation, mice were placed in a corner of the box to initiate test session. Feeding latency was measured during 10 min period.

**Forced Swim Test (FST).** Mice were placed individually in a cylinder (height 30 cm, diameter 15 cm) with water (22 ± 1 °C, 12-cm depth) for 6 min, and the total period of immobility was measured.

**Learned Helplessness Test (LHT).** Mice were placed on a commercial shuttle box divided into two equal compartments by a central barrier (Gemini Avoidance System, San Diego Instruments, San Diego, CA, USA). Mice were given inescapable electric footshocks (180 scrambled footshocks, 0.3 mA intensity), and escape performance was tested 24 h later in the same chamber with 30 escape trials per mouse (25-sec maximum duration, 0.3 mA footshock amplitude). The shuttle door opens at the beginning of the shock and each trial is terminated when the mouse crosses into the nonshock compartment, or when a 25-sec duration is reached. Latencies to escape over first 10 escape trials and last 10 escape trials were analyzed.

**Hippocampal Dissection.** Mice were killed after the probe trial by cervical dislocation, and brains were removed from the skull. Brains were then chilled in ice-cold HBSS, and all further manipulations were performed on an ice-cooled plate. Whole hippocampus was dissected from the brain, and 500 µm-thick slices, transverse to the longitudinal axis, were cut with a Starrett tissue chopper. DG was

microdissected by hand under a dissecting microscope. Subregional boundaries were clearly visible under these conditions. Tissues were collected and then stored at  $-80\text{ }^{\circ}\text{C}$  until use.

**Malondialdehyde Measurement.** As a measure of lipid peroxidation, malondialdehyde (MDA) levels were determined using Bioxytech MDA-586 Assay Kit (OxisResearch, Oregon) as described previously (1). Assays were performed according to the manufacturer's instructions. Briefly, hippocampal tissues were homogenized in the presence of 5 mM butylated hydroxytoluene. Homogenates were centrifuged at  $3000 \times g$  for 10 min at  $4\text{ }^{\circ}\text{C}$  and supernatant was collected. Free MDA in the supernatant was converted to a stable carbocyanine dye (maximum absorption at 586 nm) by chemical reaction with N-methyl-2-phenylindole. Absorbance of the supernatant was measured at 586 nm. MDA levels were normalized against the protein concentration.

**Detection of PARP Enzymatic Activity.** PARP enzymatic activity was detected using a cytochemical method as described previously (2). Cultured hippocampal neurons were fixed for 10 min in 95 % ethanol at  $-20\text{ }^{\circ}\text{C}$ , permeabilized by 0.1 % (v/v) Triton X-100 in 100 mM Tris (pH 8.0) for 15 min and then incubated with a reaction mixture, containing 10 mM  $\text{MgCl}_2$ , 1 mM dithiothreitol, 30  $\mu\text{M}$  biotinylated  $\text{NAD}^+$  (BPS Bioscience) in 100 mM Tris (pH 8.0), for 30 min at  $37\text{ }^{\circ}\text{C}$ . A biotinylated  $\text{NAD}^+$ -free reaction mixture was used as a negative control. The cells were then incubated with FITC-conjugated streptavidin (1:100; Invitrogen) to detect incorporated biotin signals, a marker of PARP activity. Cells were imaged with

identical confocal microscope settings. Staining intensity of PARP activity was quantified using ImageJ software and expressed in arbitrary units.

**Detection of Superoxide Levels.** Superoxide levels in cultured hippocampal neurons were measured using dihydroethidium (DHE), a cell membrane-permeable superoxide-sensitive fluorescent dye (Molecular Probes) by following the procedure described previously (1), with slight modifications. Briefly, hippocampal neurons were incubated for 10 min at 37 °C in HBSS buffer (pH 7.4) containing 10  $\mu$ M DHE in 24-well plates. The cells plated onto glass coverslips were washed twice with HBSS, which then was placed onto a microscope (Olympus IX71, Japan). Fluorescence intensity was detected as a marker of superoxide production. It was quantified using ImageJ software and expressed in arbitrary units.

**Western Blot Analysis.** Protein extract from hippocampal tissue or cultured hippocampal neurons was subjected to SDS-PAGE, transferred to PVDF membrane and incubated with antibodies. Extraction of nuclear protein was described previously (3). Primary antibodies were diluted in 1X TBS with 0.1 % (v/v) Tween-20 (for details, see Table S3). Specifically, anti-HDAC5(Ser279) was kindly given by Christopher W. Cowan (University of Texas Southwestern Medical Center, USA) (4), and anti-Prx2(Thr89) was kindly given by David S. Park (University of Ottawa, Canada) (5). Secondary antibodies were diluted in 1X TBS with 0.1 % (v/v) Tween-20 containing 5 % (w/v) non-fat dry milk, as follows: anti-rabbit IgG conjugated with HRP (1:2,000), anti-mouse IgG conjugated with HRP (1:2,000), anti-goat IgG conjugated with HRP (1:2,000). Blots were developed with enhanced

chemiluminescence western blotting detection system (ECL STAR; Dyne Bio, Korea). Optical density was measured using ImageJ software to quantify the blots.

**Immunoprecipitation.** Mouse hippocampus was homogenized in lysis buffer (Cell signaling) containing protease inhibitor and phosphatase inhibitor cocktail 2 and 3 (Sigma). Cdk5 was immunoprecipitated from hippocampal tissue lysates using anti-Cdk5 monoclonal antibody (Abcam, ab28441) or anti-Cdk5 polyclonal antibody (Santa Cruz Biotechnology, sc-173) in HNTG buffer (20 mM HEPES pH 7.5, 150 mM NaCl, 0.1 % Triton X-100 and 10 % glycerol) overnight at 4 °C. Anti-rabbit IgG (Millipore) or anti-mouse IgG (Millipore) was used as a negative control. Protein A-agarose beads (Roche) were added at 4 °C for 2 h followed by washing three times with HNTG buffer containing protease and phosphatase inhibitor cocktail. The bound proteins were denatured in 2X Laemmli sample buffer (126 mM Tris-HCl, 20 % glycerol, 4 % SDS, 0.02 % bromophenol blue), boiled 10 min, and analyzed by immunoblotting with anti-p35 antibody (Santa Cruz Biotechnology, sc-820). Prx2 was immunoprecipitated with anti-Prx2 monoclonal antibody (R&D Systems, MAB3489) in the same way as for Cdk5 immunoprecipitation.

**Cdk5 Activity Assay.** Cdk5 activity assay was performed using ADP-Glo™ kinase assay kit according to manufacturer's protocol with slight modifications (Promega, Madison, WI). In brief, for endogenous kinase assays, endogenous Cdk5 was immunoprecipitated from hippocampal tissue extract using anti-Cdk5 monoclonal antibody (Abcam, ab28441) or anti-Cdk5 polyclonal antibody (Santa Cruz Biotechnology, sc-173) under non-denaturing conditions. For kinase reaction, immunoprecipitates were incubated with 20 µg Histone H1 and 50 µM ATP at room

temperature for 10 min. ADP was produced during Cdk5 kinase reaction and then converted to ATP, which was converted to light, by chemical reaction with kinase detection reagent. The luminescence was measured with a plate-reading luminometer and expressed in relative light units (RLU).

**Hippocampal Primary Neuronal Cell Culture.** Whole brains were collected from C57BL/6 mouse E14 embryos. Embryonic hippocampus was dissected in ice-cold  $\text{Ca}^{2+}/\text{Mg}^{2+}$ -free HBSS (Gibco), followed by removal of blood vessels and meninges. The hippocampal tissue was then incubated with 0.05 % trypsin-EDTA (Wel Gene, Korea) at 37 °C for 5–10 min, then dissolved in neurobasal (NB) medium (Gibco) containing 10 % (v/v) FBS (Wel Gene), 0.5 mM L-glutamine (Sigma), and 1 % 100X penicillin-streptomycin (Wel Gene). After centrifugation at 200 x g for 1 min, the pelleted cells were gently resuspended in the culture medium and plated at 40,000–50,000 cells per  $\text{cm}^2$  on poly-L-lysine-coated (25  $\mu\text{g}/\text{mL}$  in PBS; Sigma) and laminin-coated (10  $\mu\text{g}/\text{mL}$  in PBS; Invitrogen) culture dishes. Hippocampal cultures were grown for 1 d in NB medium containing 10 % (v/v) FBS, 0.5 mM L-glutamine, and 1 % 100X penicillin-streptomycin. The medium was changed the following day to NB medium supplemented with 2 % (v/v) B27 (Gibco) serum-free supplement, 0.5 mM L-glutamine, and 1 % 100X penicillin-streptomycin antibiotic mixture. Cultures were maintained for 7–12 d at 37 °C in a 5 %  $\text{CO}_2$ /95 % air-humidified incubator. The neurons were used after 7–12 d.

**Calcium Imaging.** Cultured hippocampal neurons were loaded with the fluorescent  $\text{Ca}^{2+}$  indicator Fura-2 AM (5  $\mu\text{M}$ ; Molecular Probes, Eugene, OR, USA) for 40 min at 37 °C. The cells plated onto glass coverslips were mounted onto the recording

chamber, which then was placed onto an inverted microscope (Olympus IX70, Japan). The recording chamber was initially perfused with 2 mM  $\text{Ca}^{2+}$  bath, and test solutions including each drug,  $\text{H}_2\text{O}_2$  (1 mM; JUNSEI, Japan) or KCl (50 mM; Sigma Aldrich, Germany), were applied by a gravity-driven multi-channel system (ALA-VM8, ALA Scientific Instruments, USA). Cells were illuminated with a lamp, and excitation wavelengths (340/380 nm) were selected by the Lambda 10-B (Shutter Instrument, Novato, CA). Intracellular  $\text{Ca}^{2+}$  concentration ( $[\text{Ca}^{2+}]_i$ ) was measured by microfluorometry with an ORCA-Flash2.8 Digital CMOS camera (HAMAMATSU, Japan) coupled to a microscope and software (MetaMorph<sup>®</sup> NX, Molecular Devices, USA) on a computer.

**Hippocampal Slice Preparation and Patch-Clamp Recordings.** Mice were decapitated, and the brain was rapidly removed from the skull and stored in ice-cold artificial cerebrospinal fluid (ACSF) containing (in mM): 124 NaCl, 3 KCl, 1.25  $\text{NaH}_2\text{PO}_4$ , 1.3  $\text{MgCl}_2$ , 1.3  $\text{CaCl}_2$ , 26  $\text{NaHCO}_3$ , and 10 glucose, oxygenated with 95 %  $\text{O}_2$  and 5 %  $\text{CO}_2$  (pH 7.4; 300mOsmol). Transverse 300- $\mu\text{m}$ -thick hippocampal slices were cut using a vibrating microtome (Vibratome Series 1000; Technical Products International, St. Louis, MO). Before recordings, slices were recovered by incubating in ACSF (30 °C) which was continuously gassed with 95 %  $\text{O}_2$  and 5 %  $\text{CO}_2$ . Individual slices were then transferred to an immersion-recording chamber on an upright, fixed-stage microscope equipped with infrared, differential interference contrast optics (Olympus BX50WI) and continuously perfused with oxygenated ACSF. Synaptic activity was recorded from visually identified DG granule cells using whole-cell patch-clamp recordings. Currents were recorded using an EPC-10 patch clamp amplifier (HEKA Elektronik, Lambrecht, Germany) and PatchMaster software



(HEKA Elektronik). Patch pipettes were pulled from borosilicate glass (1.5 mm outer diameter, 0.86 mm wall thickness; Sutter Instruments, Novato, CA) with a P-97 puller (Sutter Instruments), and the resistance of open tip was 4–7 M $\Omega$ . The intracellular pipette solution contained (in mM): 140 K<sup>+</sup> gluconate, 1 NaCl, 5 EGTA, 10 HEPES, 1 MgCl<sub>2</sub>, 1 CaCl<sub>2</sub>, 3 KOH, 2 ATP and 0.2 % biocytin (pH 7.15–7.3). The recording electrode was trained on DG granule cells using positive pressure. Once in whole cell configuration, the cell was held at –70 mV for equilibration of intracellular and recording pipette contents. Series resistance was monitored throughout the recordings, and recordings where the series resistance was remained < 25 M $\Omega$  and changed by  $\leq$  20 % during the recordings were only used for analysis.

**Construction of shRNA-Expressing Vectors and Lentivirus Production.** For gene silencing, shRNAs were cloned into the pLB lentiviral vector as previously described (6). The target sequences were the following: *Luciferase* shRNA (shLuc, control shRNA), 5'-CTTCGAAATGTCCGTTCCGGTT-3'; *Cdk5* shRNA (shCdk5), 5'-GTACCCAGCTACAACATCCTT-3'; *Trpm2* shRNA (shTRPM2), 5'-GCTCATGGATTCCCGAGAATA-3'. Lentivirus was produced by co-transfection of shLuc, shCdk5 or shTRPM2 with lentiviral packaging plasmids, pMD2.G and psPAX2, into 293T cells (ATCC, Manassas, VA, USA) by the calcium-phosphate method, as described by the RNAi Consortium (<http://www.broadinstitute.org>).

**Viral-Mediated Gene Transfer.** Mice were generally anesthetized with a mixture of Rompun (8.5 mg/kg) and Zoletil (17 mg/kg), and prepared for stereotaxic surgery. Lentiviral placements were confirmed by GFP fluorescence, which was coexpressed in each virus.

**Genotyping and RT-PCR.** To determine the mouse genotype, genomic DNA was isolated from mouse tail tissue using LaboPass<sup>TM</sup> Tissue Genomic DNA Mini Prep Kit (Cosmo Genetech, Korea). PCR was carried out using the purified genomic DNA with the primer sets of PTRPM2-13F, PTRPM2-10R, and Pneo-5'a; sequences are PTRPM2-13F (5'-CTTGGGTTGCAGTCATATGCAGGC-3'), PTRPM2-10R (5'-GCCCTCACCATCCGCTTCACGATG-3'), and Pneo5'a (5'-GCCACACGCGTCACCTTAATATGCG-3').

**BrdU Administration and Quantitative Analysis.** Mice were received BrdU injection (i.p., 50 mg/kg; Sigma) for 3 days of the last CUS period to examine survival of NPCs. Two weeks after BrdU injection, mice were perfused, and BrdU immunohistochemistry was performed. BrdU<sup>+</sup> cells colabeled with NeuN were counted in the GCL (three to four coronal 25 µm sections per animal) using a fluorescence confocal microscope (Leica Microsystems) at X400, plus video camera and LEICA IM50 software (Leica Microsystems, Wetzlar, Germany). BrdU<sup>+</sup> cells colabeled with GFAP were also quantified in DG. For analysis of NPCs proliferation, mice were administered an i.p. injection of BrdU (50 mg/kg; Sigma) on the last 3 days. One day after BrdU injection, mice were killed and transcardially perfused. The number of BrdU<sup>+</sup> cells was counted in the SGZ.

**Immunohistochemistry and Immunocytochemistry.** Mice were transcardially perfused with cold 4 % (w/v) paraformaldehyde (PFA) in PBS. Brains were postfixed in the same solution overnight at 4 °C and stored in 30 % (w/v) sucrose at 4 °C. Serial sections (25 µm) of the brains were cut coronally through the entire hippocampus. For

detection of BrdU, the sections were processed as described previously (7). For other types of immunofluorescent labeling, the sections were blocked with 3 % (w/v) bovine serum albumin (BSA) in PBS containing 0.3 % Triton X-100 for 1 h at room temperature and incubated with primary antibodies in the blocking solution overnight at 4 °C. Primary antibodies used for immunohistochemistry are described in Table S3. The sections were then incubated 2 h at room temperature with Alexa 488-conjugated (Invitrogen) and Cy3-labeled (Jackson ImmunoResearch) secondary antibodies diluted in PBS. The sections were mounted in Vectashield containing 4'-6-diamidino-2-phenylindole (DAPI; Vector Laboratories, Burlingame, CA) and visualized with a confocal microscope (Leica Microsystems, Wetzlar, Germany). Cultured hippocampal neurons were fixed with 4 % PFA in PBS for 20 min at room temperature. Fixed cells were washed with PBS and blocked with 10 % (v/v) normal goat serum containing 0.3 % Triton X-100. Cells were then stained with indicated primary and secondary antibodies followed by mounting in Vectashield containing DAPI.

**Quantitative Real-Time PCR.** Total RNA was isolated from mouse hippocampal tissue using Trizol reagent (Sigma). Reverse transcription of 1 µg of total RNA was performed with oligonucleotide deoxythymidine primer using Improm-II™ Reverse Transcription System (Promega). The resulting cDNA was used as a template for the amplification of target gene transcripts by real time PCR. Quantitative real-time PCR (qPCR) was performed on a CFX96 Touch™ Real-Time PCR Detection System (Bio-Rad Laboratories, CA, USA) using SensiFAST™ SYBR No-ROX mix (Bioline) according to the instructions of the manufacturer. The PCR primers are described in Table S4. All gene expression values were normalized to those of β-actin.

**Microarray Analysis.** The gene expression microarray dataset was obtained from the NCBI Gene Expression Omnibus (GEO, <http://www.ncbi.nlm.nih.gov/geo/>), accession number GSE53987. The dataset is described in detail in Lanz *et al.* (8). Briefly, frozen sections of human brain were dissected to obtain tissue samples of the hippocampus, Brodmann Area 46 and associative striatum. Total RNAs were isolated from the samples and microarray experiments were conducted with an Affymetrix platform (U133Plus-v2 Affymetrix whole genome microarray chips). The gene expression data were processed with Robust Multi-array Average (RMA). To identify differences in hippocampal gene expression between control subjects and subjects with MDD, a subset of the samples collected from the hippocampus were selected, and they were then filtered to exclude samples with low quality (brain pH  $\leq 6.5$  and RNA Integrity Number (RIN)  $\leq 6.0$ ) (9, 10). Demographic information for the subjects with MDD and matched controls is given in Table S5. The expression data were normalized by quantile normalization, and log<sub>2</sub>-transformed. Differentially expressed genes were identified using the LIMMA (Linear modeling of Microarray data) package (11). Because of the small sample size, the usual statistical criteria used in microarray analysis (i.e., false discovery rate, FDR < 0.05) were not appropriate for revealing differences between the groups. Hence, *p*-values were used to obtain potentially interesting genes (*p*-value < 0.05). All data analyses and visualization were conducted using R 3.4.3 ([www.r-project.org](http://www.r-project.org)).

**Statistical Analysis.** Unpaired two-tailed Student's *t* tests were used to compare 2-group data, as appropriate. Multiple comparisons were evaluated by one-way or two-way ANOVA and Bonferroni's *post hoc* test, when appropriate. Behavioral findings

were successfully replicated with mice from different litters and in several instances, across independent cohorts. Sample sizes for behavioral studies were determined based on similar work in the literature. All experiments were carried out at least three times, and data consistency was observed in repeated experiments. For all analyses  $p < 0.05$  was considered statistically significant, and all data are presented as means  $\pm$  SEM.

## References

1. Seo JS, *et al.* (2012) NADPH oxidase mediates depressive behavior induced by chronic stress in mice. *J Neurosci* 32(28):9690-9699.
2. Park L, *et al.* (2014) The key role of transient receptor potential melastatin-2 channels in amyloid-beta-induced neurovascular dysfunction. *Nat Commun* 5:5318.
3. Bouvier E, *et al.* (2017) Nrf2-dependent persistent oxidative stress results in stress-induced vulnerability to depression. *Mol Psychiatry* 22(12):1701-1713.
4. Taniguchi M, *et al.* (2012) Histone deacetylase 5 limits cocaine reward through cAMP-induced nuclear import. *Neuron* 73(1):108-120.
5. Qu D, *et al.* (2007) Role of Cdk5-mediated phosphorylation of Prx2 in MPTP toxicity and Parkinson's disease. *Neuron* 55(1):37-52.
6. Jo S, *et al.* (2011) Inhibition of PCGF2 enhances granulocytic differentiation of acute promyelocytic leukemia cell line HL-60 via induction of HOXA7. *Biochem Biophys Res Commun* 416(1-2):86-91.
7. Koo JW, Russo SJ, Ferguson D, Nestler EJ, & Duman RS (2010) Nuclear factor-kappaB is a critical mediator of stress-impaired neurogenesis and depressive behavior. *Proc Natl Acad Sci U S A* 107(6):2669-2674.
8. Lanz TA, *et al.* (2015) STEP levels are unchanged in pre-frontal cortex and associative striatum in post-mortem human brain samples from subjects with schizophrenia, bipolar disorder and major depressive disorder. *PLoS One* 10(3):e0121744.
9. Sonntag KC, *et al.* (2016) Limited predictability of postmortem human brain tissue quality by RNA integrity numbers. *J Neurochem* 138(1):53-59.
10. Stan AD, *et al.* (2006) Human postmortem tissue: what quality markers matter? *Brain Res* 1123(1):1-11.
11. Ritchie ME, *et al.* (2015) limma powers differential expression analyses for RNA-sequencing and microarray studies. *Nucleic Acids Res* 43(7):e47.

Supplemental Tables

Table S1. Statistical parameters

| Figure Number          | Test Used                  | N                                                                                                                                                                                 |                | Descriptive States<br>(Average, Variance) | P Value                                                                                                                                                                                                                                                                                                                                                                | Degrees Of Freedom Value                                                                                 |
|------------------------|----------------------------|-----------------------------------------------------------------------------------------------------------------------------------------------------------------------------------|----------------|-------------------------------------------|------------------------------------------------------------------------------------------------------------------------------------------------------------------------------------------------------------------------------------------------------------------------------------------------------------------------------------------------------------------------|----------------------------------------------------------------------------------------------------------|
|                        |                            | Exact Value                                                                                                                                                                       | Defined        |                                           |                                                                                                                                                                                                                                                                                                                                                                        |                                                                                                          |
| 1B<br>( <i>Trpm2</i> ) | Student's t-test           | <b>Home cage</b><br><i>Trpm2</i> <sup>+/+</sup> (6);<br><b>CUS</b><br><i>Trpm2</i> <sup>+/+</sup> (5)                                                                             | Mice per group | Error bars are mean±SEM                   | p=0.0073                                                                                                                                                                                                                                                                                                                                                               | t(9)=-3.016                                                                                              |
| 1C                     | Student's t-test           | <b>Home cage</b><br><i>Trpm2</i> <sup>+/+</sup> (6);<br><b>CUS</b><br><i>Trpm2</i> <sup>+/+</sup> (4)                                                                             | Mice per group | Error bars are mean±SEM                   | p=0.0326                                                                                                                                                                                                                                                                                                                                                               | t(8)=-2.1355                                                                                             |
| 1D                     | Two-way ANOVA              | <b>Home cage</b><br><i>Trpm2</i> <sup>+/+</sup> (10),<br><i>Trpm2</i> <sup>-/-</sup> (7);<br><b>CUS</b><br><i>Trpm2</i> <sup>+/+</sup> (10),<br><i>Trpm2</i> <sup>-/-</sup> (7)   | Mice per group | Error bars are mean±SEM                   | Genotype x Stress interaction p=0.0156;<br>Genotype p=0.0035;<br>Stress p<0.0001<br><br>Bonferroni posttest:<br>Home cage <i>Trpm2</i> <sup>+/+</sup> vs CUS <i>Trpm2</i> <sup>+/+</sup> p<0.001;<br>CUS <i>Trpm2</i> <sup>+/+</sup> vs CUS <i>Trpm2</i> <sup>-/-</sup> p<0.001                                                                                        | Genotype x Stress interaction<br>F(1,30)=6.578;<br>Genotype<br>F(1,30)=10.03; Stress<br>F(1,30)=21.32    |
| 1E                     | Two-way ANOVA              | <b>Home cage</b><br><i>Trpm2</i> <sup>+/+</sup> (6),<br><i>Trpm2</i> <sup>-/-</sup> (6);<br><b>CUS</b><br><i>Trpm2</i> <sup>+/+</sup> (6),<br><i>Trpm2</i> <sup>-/-</sup> (6)     | Mice per group | Error bars are mean±SEM                   | Genotype x Stress interaction p=0.0257;<br>Genotype p<0.0001;<br>Stress p<0.0001<br><br>Bonferroni posttest:<br>Home cage <i>Trpm2</i> <sup>+/+</sup> vs CUS <i>Trpm2</i> <sup>+/+</sup> p<0.001;<br>Home cage <i>Trpm2</i> <sup>+/+</sup> vs Home cage <i>Trpm2</i> <sup>-/-</sup> p<0.05; CUS <i>Trpm2</i> <sup>+/+</sup> vs CUS <i>Trpm2</i> <sup>-/-</sup> p<0.001 | Genotype x Stress interaction<br>F(1,20)=5.805;<br>Genotype<br>F(1,20)=46.52; Stress<br>F(1,20)=32.78    |
| 1F                     | Two-way ANOVA              | <b>Home cage</b><br><i>Trpm2</i> <sup>+/+</sup> (11),<br><i>Trpm2</i> <sup>-/-</sup> (10);<br><b>CUS</b><br><i>Trpm2</i> <sup>+/+</sup> (11),<br><i>Trpm2</i> <sup>-/-</sup> (12) | Mice per group | Error bars are mean±SEM                   | Genotype x Stress interaction p=0.2442;<br>Genotype p=0.0023;<br>Stress p=0.9711<br><br>Bonferroni posttest:<br>CUS <i>Trpm2</i> <sup>+/+</sup> vs CUS <i>Trpm2</i> <sup>-/-</sup> p<0.01                                                                                                                                                                              | Genotype x Stress interaction<br>F(1,40)=1.397;<br>Genotype<br>F(1,40)=10.62; Stress<br>F(1,40)=0.001327 |
|                        | Unpaired two-tailed t test | <b>Home cage</b><br><i>Trpm2</i> <sup>+/+</sup> (11),<br><i>Trpm2</i> <sup>-/-</sup> (10);<br><b>CUS</b><br><i>Trpm2</i> <sup>+/+</sup> (11),<br><i>Trpm2</i> <sup>-/-</sup> (12) | Mice per group | Error bars are mean±SEM                   | CUS <i>Trpm2</i> <sup>+/+</sup> vs CUS <i>Trpm2</i> <sup>-/-</sup> p=0.007                                                                                                                                                                                                                                                                                             | t(21)=-2.987                                                                                             |
| 1G                     | Two-way ANOVA              | <b>Home cage</b><br><i>Trpm2</i> <sup>+/+</sup> (12),<br><i>Trpm2</i> <sup>-/-</sup> (15);<br><b>CUS</b><br><i>Trpm2</i> <sup>+/+</sup> (11),<br><i>Trpm2</i> <sup>-/-</sup> (16) | Mice per group | Error bars are mean±SEM                   | Genotype x Stress interaction p=0.001;<br>Genotype p<0.0001;<br>Stress p=0.0015<br><br>Bonferroni posttest:<br>Home cage <i>Trpm2</i> <sup>+/+</sup> vs CUS <i>Trpm2</i> <sup>+/+</sup>                                                                                                                                                                                | Genotype x Stress interaction<br>F(1,50)=12.32;<br>Genotype<br>F(1,50)=55.24; Stress<br>F(1,50)=11.26    |

|    |               |                                                                                                                                                                                                                                                                                                                                                                                 |                 |                         |                                                                                                                                                                                                                                                                                                                                                                                             |                                                                                                           |
|----|---------------|---------------------------------------------------------------------------------------------------------------------------------------------------------------------------------------------------------------------------------------------------------------------------------------------------------------------------------------------------------------------------------|-----------------|-------------------------|---------------------------------------------------------------------------------------------------------------------------------------------------------------------------------------------------------------------------------------------------------------------------------------------------------------------------------------------------------------------------------------------|-----------------------------------------------------------------------------------------------------------|
|    |               |                                                                                                                                                                                                                                                                                                                                                                                 |                 |                         | p<0.001;<br>Home cage <i>Trpm2</i> <sup>+/+</sup><br>vs Home cage<br><i>Trpm2</i> <sup>-/-</sup> p<0.05; CUS<br><i>Trpm2</i> <sup>+/+</sup> vs CUS<br><i>Trpm2</i> <sup>-/-</sup> p<0.001                                                                                                                                                                                                   |                                                                                                           |
| 1H | Two-way ANOVA | <b>Home cage</b><br><i>Trpm2</i> <sup>+/+</sup> (13),<br><i>Trpm2</i> <sup>-/-</sup> (15);<br><br><b>CUS</b><br><i>Trpm2</i> <sup>+/+</sup> (15),<br><i>Trpm2</i> <sup>-/-</sup> (15)                                                                                                                                                                                           | Mice per group  | Error bars are mean±SEM | Genotype x Stress interaction p=0.0294;<br>Genotype p<0.0001;<br>Stress p=0.094<br><br>Bonferroni posttest:<br>Home cage <i>Trpm2</i> <sup>+/+</sup><br>vs CUS <i>Trpm2</i> <sup>+/+</sup><br>p<0.05;<br>Home cage <i>Trpm2</i> <sup>+/+</sup><br>vs Home cage<br><i>Trpm2</i> <sup>-/-</sup> p<0.001;<br>CUS <i>Trpm2</i> <sup>+/+</sup> vs CUS<br><i>Trpm2</i> <sup>-/-</sup> p<0.001     | Genotype x Stress interaction<br>F(1,54)=5.006;<br><br>Genotype<br>F(1,54)=65.61; Stress<br>F(1,54)=2.905 |
| 1I | Two-way ANOVA | <b>Home cage</b><br><i>Trpm2</i> <sup>+/+</sup> (15),<br><i>Trpm2</i> <sup>-/-</sup> (14);<br><b>CUS</b><br><i>Trpm2</i> <sup>+/+</sup> (13)<br><i>Trpm2</i> <sup>-/-</sup> (17)                                                                                                                                                                                                | Mice per group  | Error bars are mean±SEM | Genotype x Stress interaction p=0.0092;<br>Genotype p<0.0001;<br>Stress p=0.0011<br><br>Bonferroni posttest:<br>Home cage <i>Trpm2</i> <sup>+/+</sup><br>vs CUS <i>Trpm2</i> <sup>+/+</sup><br>p<0.001;<br>CUS <i>Trpm2</i> <sup>+/+</sup> vs CUS<br><i>Trpm2</i> <sup>-/-</sup> p<0.001                                                                                                    | Genotype x Stress interaction<br>F(1,55)=7.286;<br>Genotype<br>F(1,55)=32.84; Stress<br>F(1,55)=11.81     |
| 2A | Two-way ANOVA | <b><i>Trpm2</i><sup>+/+</sup></b><br>Control (50),<br>H <sub>2</sub> O <sub>2</sub> 500 μM (50), H <sub>2</sub> O <sub>2</sub> 1 mM (50),<br>H <sub>2</sub> O <sub>2</sub> 10 mM (50);<br><b><i>Trpm2</i><sup>-/-</sup></b><br>Control (38),<br>H <sub>2</sub> O <sub>2</sub> 500 μM (46), H <sub>2</sub> O <sub>2</sub> 1 mM (53),<br>H <sub>2</sub> O <sub>2</sub> 10 mM (51) | Cells per group | Error bars are mean±SEM | Genotype x Durg interaction p<0.0001;<br>Genotype p<0.0001;<br>Durg p<0.0001<br><br>Bonferroni posttest:<br><b><i>Trpm2</i><sup>+/+</sup></b><br>Control vs 500 μM<br>p<0.001;<br><b><i>Trpm2</i><sup>+/+</sup></b><br>Control vs 1 mM<br>p<0.001;<br><b><i>Trpm2</i><sup>+/+</sup></b><br>Control vs 10 mM<br>p<0.001;<br><b><i>Trpm2</i><sup>-/-</sup></b><br>Control vs 10 mM<br>p<0.001 | Genotype x Drug interaction<br>F(3,380)=45.17;<br>Genotype<br>F(1,380)=1,057; Drug<br>F(3,380)=107.6      |
| 2B | Two-way ANOVA | <b><i>Trpm2</i><sup>+/+</sup></b><br>Control (50),<br>H <sub>2</sub> O <sub>2</sub> 500 μM (50), H <sub>2</sub> O <sub>2</sub> 1 mM (50),<br>DEXA 10 μM (50);<br><b><i>Trpm2</i><sup>-/-</sup></b><br>Control (50),<br>H <sub>2</sub> O <sub>2</sub> 500 μM (50), H <sub>2</sub> O <sub>2</sub> 1 mM (50),<br>DEXA 10 μM (50)                                                   | Cells per group | Error bars are mean±SEM | Genotype x Durg interaction p<0.0001;<br>Genotype p<0.0001;<br>Durg p<0.0001<br><br>Bonferroni posttest:<br><b><i>Trpm2</i><sup>+/+</sup></b><br>Control vs H <sub>2</sub> O <sub>2</sub> 500 μM<br>p<0.001;<br><b><i>Trpm2</i><sup>+/+</sup></b><br>Control vs H <sub>2</sub> O <sub>2</sub> 1 mM<br>p<0.001;<br><b><i>Trpm2</i><sup>+/+</sup></b><br>Control vs DEXA 10 μM<br>p<0.001     | Genotype x Drug interaction<br>F(3,392)=96.43;<br>Genotype<br>F(1,392)=447.3; Drug<br>F(3,392)=94.67      |
| 2C | Student's     | <i>Trpm2</i> <sup>+/+</sup> (3);                                                                                                                                                                                                                                                                                                                                                | Mice per group  | Error bars are          | p=0.0219                                                                                                                                                                                                                                                                                                                                                                                    | t(4)=2.905                                                                                                |



|            | t-test                     | <i>Trpm2</i> <sup>-/-</sup> (3)                                                                                                                                                 | group          | mean±SEM                |                                                                                                                                                                                                                                                                                                                                                                       |                                                                                                                                                                                                                                                                              |
|------------|----------------------------|---------------------------------------------------------------------------------------------------------------------------------------------------------------------------------|----------------|-------------------------|-----------------------------------------------------------------------------------------------------------------------------------------------------------------------------------------------------------------------------------------------------------------------------------------------------------------------------------------------------------------------|------------------------------------------------------------------------------------------------------------------------------------------------------------------------------------------------------------------------------------------------------------------------------|
| 3B         | Two-way ANOVA              | <b>Home cage</b><br><i>Trpm2</i> <sup>+/+</sup> (5),<br><i>Trpm2</i> <sup>-/-</sup> (4);<br><b>CUS</b><br><i>Trpm2</i> <sup>+/+</sup> (5)<br><i>Trpm2</i> <sup>-/-</sup> (5)    | Mice per group | Error bars are mean±SEM | Genotype x Stress interaction p=0.0144;<br>Genotype p=0.001;<br>Stress p=0.0099<br><br>Bonferroni posttest:<br>Home cage <i>Trpm2</i> <sup>+/+</sup> vs CUS <i>Trpm2</i> <sup>+/+</sup> p<0.01;<br>CUS <i>Trpm2</i> <sup>+/+</sup> vs CUS <i>Trpm2</i> <sup>-/-</sup> p<0.001                                                                                         | Genotype x Stress interaction<br>F(1,15)=7.659;<br>Genotype<br>F(1,15)=16.52; Stress<br>F(1,15)=8.716                                                                                                                                                                        |
| 3C         | Two-way ANOVA              | <b>Home cage</b><br><i>Trpm2</i> <sup>+/+</sup> (4),<br><i>Trpm2</i> <sup>-/-</sup> (4);<br><b>CUS</b><br><i>Trpm2</i> <sup>+/+</sup> (4)<br><i>Trpm2</i> <sup>-/-</sup> (4)    | Mice per group | Error bars are mean±SEM | Genotype x Stress interaction p=0.1168;<br>Genotype p<0.0001;<br>Stress p=0.0016<br><br>Bonferroni posttest:<br>Home cage <i>Trpm2</i> <sup>+/+</sup> vs CUS <i>Trpm2</i> <sup>+/+</sup> p<0.01;<br>Home cage <i>Trpm2</i> <sup>+/+</sup> vs Home cage <i>Trpm2</i> <sup>-/-</sup> p<0.05; CUS <i>Trpm2</i> <sup>+/+</sup> vs CUS <i>Trpm2</i> <sup>-/-</sup> p<0.001 | Genotype x Stress interaction<br>F(1,12)=2.857;<br>Genotype<br>F(1,12)=40.88; Stress<br>F(1,12)=16.39                                                                                                                                                                        |
|            | Unpaired two-tailed t test | <b>Home cage</b><br><i>Trpm2</i> <sup>+/+</sup> (4),<br><i>Trpm2</i> <sup>-/-</sup> (4);<br><b>CUS</b><br><i>Trpm2</i> <sup>+/+</sup> (4)<br><i>Trpm2</i> <sup>-/-</sup> (4)    | Mice per group | Error bars are mean±SEM | Home cage <i>Trpm2</i> <sup>+/+</sup> vs CUS <i>Trpm2</i> <sup>+/+</sup> p=0.0027;<br><br>Home cage <i>Trpm2</i> <sup>+/+</sup> vs Home cage <i>Trpm2</i> <sup>-/-</sup> p=0.0245;<br><br>CUS <i>Trpm2</i> <sup>+/+</sup> vs CUS <i>Trpm2</i> <sup>-/-</sup> p=0.0086                                                                                                 | Home cage <i>Trpm2</i> <sup>+/+</sup> vs CUS <i>Trpm2</i> <sup>+/+</sup> t(6)=-4.905;<br><br>Home cage <i>Trpm2</i> <sup>+/+</sup> vs Home cage <i>Trpm2</i> <sup>-/-</sup> t(6)=2.983;<br><br>CUS <i>Trpm2</i> <sup>+/+</sup> vs CUS <i>Trpm2</i> <sup>-/-</sup> t(3)=6.168 |
| 4A (SYN1)  | Two-way ANOVA              | <b>DMSO</b><br><i>Trpm2</i> <sup>+/+</sup> (3),<br><i>Trpm2</i> <sup>-/-</sup> (3);<br><b>Roscovitine</b><br><i>Trpm2</i> <sup>+/+</sup> (3)<br><i>Trpm2</i> <sup>-/-</sup> (3) | Mice per group | Error bars are mean±SEM | Genotype x Durg interaction p=0.1304;<br>Genotype p=0.0025;<br>Durg p=0.0110<br><br>Bonferroni posttest:<br><b><i>Trpm2</i><sup>-/-</sup></b><br>DMSO vs Roscovitine p<0.05;<br><b>DMSO</b><br><i>Trpm2</i> <sup>+/+</sup> vs <i>Trpm2</i> <sup>-/-</sup> p<0.01                                                                                                      | Genotype x Drug interaction<br>F(1,8)=2.840;<br>Genotype<br>F(1,8)=18.88;<br>Drug F(1,8)=10.84                                                                                                                                                                               |
|            | Unpaired two-tailed t test | <b>DMSO</b><br><i>Trpm2</i> <sup>+/+</sup> (3),<br><i>Trpm2</i> <sup>-/-</sup> (3);<br><b>Roscovitine</b><br><i>Trpm2</i> <sup>+/+</sup> (3)<br><i>Trpm2</i> <sup>-/-</sup> (3) | Mice per group | Error bars are mean±SEM | <b><i>Trpm2</i><sup>-/-</sup></b><br>DMSO vs Roscovitine p=0.0174;<br><br><b>DMSO</b><br><i>Trpm2</i> <sup>+/+</sup> vs <i>Trpm2</i> <sup>-/-</sup> p=0.0003                                                                                                                                                                                                          | <b><i>Trpm2</i><sup>-/-</sup></b><br>DMSO vs Roscovitine t(4)=3.907<br><br><b>DMSO</b><br><i>Trpm2</i> <sup>+/+</sup> vs <i>Trpm2</i> <sup>-/-</sup> t(4)=-11.468                                                                                                            |
| 4A (HDAC5) | Two-way ANOVA              | <b>DMSO</b><br><i>Trpm2</i> <sup>+/+</sup> (3),<br><i>Trpm2</i> <sup>-/-</sup> (3);<br><b>Roscovitine</b><br><i>Trpm2</i> <sup>+/+</sup> (3)<br><i>Trpm2</i> <sup>-/-</sup> (3) | Mice per group | Error bars are mean±SEM | Genotype x Durg interaction p=0.1016;<br>Genotype p=0.1195;<br>Durg p=0.0011<br><br>Bonferroni posttest:<br><b><i>Trpm2</i><sup>-/-</sup></b><br>DMSO vs Roscovitine p<0.01                                                                                                                                                                                           | Genotype x Drug interaction<br>F(1,8)=3.420;<br>Genotype<br>F(1,8)=3.038;<br>Drug F(1,8)=24.83                                                                                                                                                                               |

|            |                            |                                                                                                                                                                                                                                                                        |                |                         |                                                                                                                                                                                                                                                                                                                                                                       |                                                                                                                                                                                                                                                                                     |
|------------|----------------------------|------------------------------------------------------------------------------------------------------------------------------------------------------------------------------------------------------------------------------------------------------------------------|----------------|-------------------------|-----------------------------------------------------------------------------------------------------------------------------------------------------------------------------------------------------------------------------------------------------------------------------------------------------------------------------------------------------------------------|-------------------------------------------------------------------------------------------------------------------------------------------------------------------------------------------------------------------------------------------------------------------------------------|
|            | Unpaired two-tailed t test | <b>DMSO</b><br><i>Trpm2</i> <sup>+/+</sup> (3),<br><i>Trpm2</i> <sup>-/-</sup> (3);<br><b>Roscovotine</b><br><i>Trpm2</i> <sup>+/+</sup> (3)<br><i>Trpm2</i> <sup>-/-</sup> (3)                                                                                        | Mice per group | Error bars are mean±SEM | <b><i>Trpm2</i><sup>+/+</sup></b><br>DMSO vs Roscovitine<br>p=0.0438;<br><br><b><i>Trpm2</i><sup>-/-</sup></b><br>DMSO vs Roscovitine<br>p=0.0154;<br><br><b>DMSO</b><br><i>Trpm2</i> <sup>+/+</sup> vs <i>Trpm2</i> <sup>-/-</sup><br>p=0.0312                                                                                                                       | <b><i>Trpm2</i><sup>+/+</sup></b><br>DMSO vs Roscovitine<br>t(4)=2.906;<br><br><b><i>Trpm2</i><sup>-/-</sup></b><br>DMSO vs Roscovitine<br>t(4)=4.0559;<br><br><b>DMSO</b><br><i>Trpm2</i> <sup>+/+</sup> vs <i>Trpm2</i> <sup>-/-</sup><br>t(4)=-3.256                             |
| 4B (SYN1)  | Two-way ANOVA              | <b>Home cage</b><br><i>Trpm2</i> <sup>+/+</sup> (3),<br><i>Trpm2</i> <sup>-/-</sup> (3);<br><b>CUS</b><br><i>Trpm2</i> <sup>+/+</sup> (3)<br><i>Trpm2</i> <sup>-/-</sup> (3)                                                                                           | Mice per group | Error bars are mean±SEM | Genotype x Stress interaction p=0.0583;<br>Genotype p<0.0001;<br>Stress p=0.0017<br><br>Bonferroni posttest:<br>Home cage <i>Trpm2</i> <sup>+/+</sup> vs CUS <i>Trpm2</i> <sup>+/+</sup> p<0.01;<br>Home cage <i>Trpm2</i> <sup>+/+</sup> vs Home cage <i>Trpm2</i> <sup>-/-</sup> p<0.01; CUS <i>Trpm2</i> <sup>+/+</sup> vs CUS <i>Trpm2</i> <sup>-/-</sup> p<0.001 | Genotype x Stress interaction<br>F(1,8)=4.875;<br>Genotype<br>F(1,8)=68.23;<br>Stress F(1,8)=21.38                                                                                                                                                                                  |
|            | Unpaired two-tailed t test | <b>Home cage</b><br><i>Trpm2</i> <sup>+/+</sup> (3),<br><i>Trpm2</i> <sup>-/-</sup> (3);<br><b>CUS</b><br><i>Trpm2</i> <sup>+/+</sup> (3)<br><i>Trpm2</i> <sup>-/-</sup> (3)                                                                                           | Mice per group | Error bars are mean±SEM | Home cage <i>Trpm2</i> <sup>+/+</sup> vs CUS <i>Trpm2</i> <sup>+/+</sup> p=0.0483;<br><br>Home cage <i>Trpm2</i> <sup>+/+</sup> vs Home cage <i>Trpm2</i> <sup>-/-</sup> p=0.0371;<br><br>CUS <i>Trpm2</i> <sup>+/+</sup> vs CUS <i>Trpm2</i> <sup>-/-</sup> p=0.0028                                                                                                 | Home cage <i>Trpm2</i> <sup>+/+</sup> vs CUS <i>Trpm2</i> <sup>+/+</sup> t(2)=4.385;<br><br>Home cage <i>Trpm2</i> <sup>+/+</sup> vs Home cage <i>Trpm2</i> <sup>-/-</sup> t(2)=-5.047;<br><br>CUS <i>Trpm2</i> <sup>+/+</sup> vs CUS <i>Trpm2</i> <sup>-/-</sup> t(4)=-6.540       |
| 4B (HDAC5) | Two-way ANOVA              | <b>Home cage</b><br><i>Trpm2</i> <sup>+/+</sup> (3),<br><i>Trpm2</i> <sup>-/-</sup> (3);<br><b>CUS</b><br><i>Trpm2</i> <sup>+/+</sup> (3)<br><i>Trpm2</i> <sup>-/-</sup> (3)                                                                                           | Mice per group | Error bars are mean±SEM | Genotype x Stress interaction p=0.0773;<br>Genotype p=0.0008;<br>Stress p=0.1420<br><br>Bonferroni posttest:<br>CUS <i>Trpm2</i> <sup>+/+</sup> vs CUS <i>Trpm2</i> <sup>-/-</sup> p<0.01                                                                                                                                                                             | Genotype x Stress interaction<br>F(1,8)=4.105;<br>Genotype<br>F(1,8)=27.44;<br>Stress F(1,8)=2.653                                                                                                                                                                                  |
|            | Unpaired two-tailed t test | <b>Home cage</b><br><i>Trpm2</i> <sup>+/+</sup> (3),<br><i>Trpm2</i> <sup>-/-</sup> (3);<br><b>CUS</b><br><i>Trpm2</i> <sup>+/+</sup> (3)<br><i>Trpm2</i> <sup>-/-</sup> (3)                                                                                           | Mice per group | Error bars are mean±SEM | Home cage <i>Trpm2</i> <sup>+/+</sup> vs CUS <i>Trpm2</i> <sup>+/+</sup> p=0.0215;<br><br>CUS <i>Trpm2</i> <sup>+/+</sup> vs CUS <i>Trpm2</i> <sup>-/-</sup> p=0.0024                                                                                                                                                                                                 | Home cage <i>Trpm2</i> <sup>+/+</sup> vs CUS <i>Trpm2</i> <sup>+/+</sup> t(4)=3.667;<br><br>CUS <i>Trpm2</i> <sup>+/+</sup> vs CUS <i>Trpm2</i> <sup>-/-</sup> t(6)=-6.848                                                                                                          |
| 4D         | Unpaired two-tailed t test | <b>Home cage</b><br><i>Trpm2</i> <sup>+/+</sup> (4),<br><i>Trpm2</i> <sup>-/-</sup> (4);<br><b>CUS</b><br><i>Trpm2</i> <sup>+/+</sup> (3)<br><i>Trpm2</i> <sup>-/-</sup> (3)<br><br>(All values from repeatedly measurement were included in statistical test; n = 66) | Mice per group | Error bars are mean±SEM | Home cage <i>Trpm2</i> <sup>+/+</sup> vs Home cage <i>Trpm2</i> <sup>-/-</sup> p<0.0001;<br><br>Home cage <i>Trpm2</i> <sup>+/+</sup> vs CUS <i>Trpm2</i> <sup>+/+</sup> p<0.0001;<br><br>CUS <i>Trpm2</i> <sup>+/+</sup> vs CUS <i>Trpm2</i> <sup>-/-</sup> p<0.0001                                                                                                 | Home cage <i>Trpm2</i> <sup>+/+</sup> vs Home cage <i>Trpm2</i> <sup>-/-</sup> t(103)=-4.140;<br><br>Home cage <i>Trpm2</i> <sup>+/+</sup> vs CUS <i>Trpm2</i> <sup>+/+</sup> t(103)=5.302;<br><br>CUS <i>Trpm2</i> <sup>+/+</sup> vs CUS <i>Trpm2</i> <sup>-/-</sup> t(108)=-5.925 |
| 4E         | Unpaired two-tailed t      | <b>Home cage</b><br><i>Trpm2</i> <sup>+/+</sup> (4),                                                                                                                                                                                                                   | Mice per group | Error bars are mean±SEM | Home cage <i>Trpm2</i> <sup>+/+</sup> vs Home cage                                                                                                                                                                                                                                                                                                                    | Home cage <i>Trpm2</i> <sup>+/+</sup> vs Home cage                                                                                                                                                                                                                                  |

|           |                            |                                                                                                                                                      |                |                         |                                                                                                                                                                                                                                                                             |                                                                                                                                                                                                                                                            |
|-----------|----------------------------|------------------------------------------------------------------------------------------------------------------------------------------------------|----------------|-------------------------|-----------------------------------------------------------------------------------------------------------------------------------------------------------------------------------------------------------------------------------------------------------------------------|------------------------------------------------------------------------------------------------------------------------------------------------------------------------------------------------------------------------------------------------------------|
|           | test                       | <i>Trpm2</i> <sup>-/-</sup> (4);<br><b>CUS</b><br><i>Trpm2</i> <sup>+/+</sup> (3)<br><i>Trpm2</i> <sup>-/-</sup> (3)<br><br>(6 to 8 cells per group) |                |                         | <i>Trpm2</i> <sup>-/-</sup> p<0.0001;<br><br>Home cage <i>Trpm2</i> <sup>+/+</sup> vs CUS <i>Trpm2</i> <sup>+/+</sup> p=0.0233;<br><br>CUS <i>Trpm2</i> <sup>+/+</sup> vs CUS <i>Trpm2</i> <sup>-/-</sup> p<0.0001                                                          | <i>Trpm2</i> <sup>-/-</sup> t(12)=-7.887;<br><br>Home cage <i>Trpm2</i> <sup>+/+</sup> vs CUS <i>Trpm2</i> <sup>+/+</sup> t(6)=3.023;<br><br>CUS <i>Trpm2</i> <sup>+/+</sup> vs CUS <i>Trpm2</i> <sup>-/-</sup> t(10)=-18.922                              |
| 5D (Cdk5) | Two-way ANOVA              | <i>Trpm2</i> <sup>+/+</sup> shLuc (3), shCdk5 (3);<br><b><i>Trpm2</i><sup>-/-</sup></b> shLuc (3), shCdk5 (3)                                        | Mice per group | Error bars are mean±SEM | Genotype x Knockdown interaction p=0.3287; Genotype p=0.1442; Knockdown p=0.0001<br><br>Bonferroni posttest: shLuc <i>Trpm2</i> <sup>+/+</sup> vs shCdk5 <i>Trpm2</i> <sup>+/+</sup> p<0.01; shLuc <i>Trpm2</i> <sup>-/-</sup> vs shCdk5 <i>Trpm2</i> <sup>-/-</sup> p<0.01 | Genotype x Knockdown interaction F(1,8)=1.082; Genotype F(1,8)=2.62; Knockdown F(1,8)=45.32                                                                                                                                                                |
|           | Unpaired two-tailed t test | <i>Trpm2</i> <sup>+/+</sup> shLuc (3), shCdk5 (3);<br><b><i>Trpm2</i><sup>-/-</sup></b> shLuc (3), shCdk5 (3)                                        | Mice per group | Error bars are mean±SEM | shLuc <i>Trpm2</i> <sup>+/+</sup> vs shLuc <i>Trpm2</i> <sup>-/-</sup> p=0.0256; shLuc <i>Trpm2</i> <sup>+/+</sup> vs shCdk5 <i>Trpm2</i> <sup>+/+</sup> p=0.0284; shLuc <i>Trpm2</i> <sup>-/-</sup> vs shCdk5 <i>Trpm2</i> <sup>-/-</sup> p=0.0018                         | shLuc <i>Trpm2</i> <sup>+/+</sup> vs shLuc <i>Trpm2</i> <sup>-/-</sup> t(4)=-3.468; shLuc <i>Trpm2</i> <sup>+/+</sup> vs shCdk5 <i>Trpm2</i> <sup>+/+</sup> t(4)=3.356; shLuc <i>Trpm2</i> <sup>-/-</sup> vs shCdk5 <i>Trpm2</i> <sup>-/-</sup> t(4)=7.331 |
| 5D (p35)  | Two-way ANOVA              | <i>Trpm2</i> <sup>+/+</sup> shLuc (3), shCdk5 (3);<br><b><i>Trpm2</i><sup>-/-</sup></b> shLuc (3), shCdk5 (3)                                        | Mice per group | Error bars are mean±SEM | Genotype x Knockdown interaction p=0.0923; Genotype p=0.1153; Knockdown p=0.0004<br><br>Bonferroni posttest: shLuc <i>Trpm2</i> <sup>-/-</sup> vs shCdk5 <i>Trpm2</i> <sup>-/-</sup> p<0.01                                                                                 | Genotype x Knockdown interaction F(1,8)=3.654; Genotype F(1,8)=3.121; Knockdown F(1,8)=33.48                                                                                                                                                               |
|           | Unpaired two-tailed t test | <i>Trpm2</i> <sup>+/+</sup> shLuc (3), shCdk5 (3);<br><b><i>Trpm2</i><sup>-/-</sup></b> shLuc (3), shCdk5 (3)                                        | Mice per group | Error bars are mean±SEM | shLuc <i>Trpm2</i> <sup>+/+</sup> vs shCdk5 <i>Trpm2</i> <sup>+/+</sup> p=0.0137; shLuc <i>Trpm2</i> <sup>-/-</sup> vs shCdk5 <i>Trpm2</i> <sup>-/-</sup> p=0.0123                                                                                                          | shLuc <i>Trpm2</i> <sup>+/+</sup> vs shCdk5 <i>Trpm2</i> <sup>+/+</sup> t(4)=4.203; shLuc <i>Trpm2</i> <sup>-/-</sup> vs shCdk5 <i>Trpm2</i> <sup>-/-</sup> t(4)=4.337                                                                                     |
| 5D (SYN1) | Two-way ANOVA              | <i>Trpm2</i> <sup>+/+</sup> shLuc (3), shCdk5 (3);<br><b><i>Trpm2</i><sup>-/-</sup></b> shLuc (3), shCdk5 (3)                                        | Mice per group | Error bars are mean±SEM | Genotype x Knockdown interaction p=0.0601; Genotype p=0.1803; Knockdown p=0.0014<br><br>Bonferroni posttest: shLuc <i>Trpm2</i> <sup>-/-</sup> vs shCdk5 <i>Trpm2</i> <sup>-/-</sup> p<0.01                                                                                 | Genotype x Knockdown interaction F(1,8)=4.789; Genotype F(1,8)=2.155; Knockdown F(1,8)=22.74                                                                                                                                                               |
|           | Unpaired two-tailed t test | <i>Trpm2</i> <sup>+/+</sup> shLuc (3), shCdk5 (3);<br><b><i>Trpm2</i><sup>-/-</sup></b> shLuc (3), shCdk5 (3)                                        | Mice per group | Error bars are mean±SEM | shLuc <i>Trpm2</i> <sup>+/+</sup> vs shLuc <i>Trpm2</i> <sup>-/-</sup> p=0.0064; shLuc <i>Trpm2</i> <sup>-/-</sup> vs shCdk5 <i>Trpm2</i> <sup>-/-</sup> p<0.0001                                                                                                           | shLuc <i>Trpm2</i> <sup>+/+</sup> vs shLuc <i>Trpm2</i> <sup>-/-</sup> t(4)=-5.234; shLuc <i>Trpm2</i> <sup>-/-</sup> vs shCdk5 <i>Trpm2</i> <sup>-/-</sup> t(4)=30.183                                                                                    |
| 5D        | Two-way                    | <i>Trpm2</i> <sup>+/+</sup>                                                                                                                          | Mice per       | Error bars are          | Genotype x                                                                                                                                                                                                                                                                  | Genotype x                                                                                                                                                                                                                                                 |

|         |                                  |                                                                                                                                            |                   |                            |                                                                                                                                                                                                                                                                                                           |                                                                                                                                                                                          |
|---------|----------------------------------|--------------------------------------------------------------------------------------------------------------------------------------------|-------------------|----------------------------|-----------------------------------------------------------------------------------------------------------------------------------------------------------------------------------------------------------------------------------------------------------------------------------------------------------|------------------------------------------------------------------------------------------------------------------------------------------------------------------------------------------|
| (HDAC5) | ANOVA                            | shLuc (3),<br>shCdk5 (3);<br><b>Trpm2</b> <sup>-/-</sup><br>shLuc (3),<br>shCdk5 (3)                                                       | group             | mean±SEM                   | Knockdown<br>interaction p=0.003;<br>Genotype p=0.0097;<br>Knockdown p=0.0002<br><br>Bonferroni posttest:<br>shLuc <i>Trpm2</i> <sup>+/+</sup> vs<br>shLuc <i>Trpm2</i> <sup>-/-</sup><br>p<0.01;<br>shLuc <i>Trpm2</i> <sup>-/-</sup> vs<br>shCdk5 <i>Trpm2</i> <sup>-/-</sup><br>p<0.001                | Knockdown<br>interaction<br>F(1,8)=17.62;<br>Genotype<br>F(1,8)=11.42;<br>Knockdown<br>F(1,8)=42.45                                                                                      |
|         | Unpaired<br>two-tailed t<br>test | <b>Trpm2</b> <sup>+/+</sup><br>shLuc (3),<br>shCdk5 (3);<br><b>Trpm2</b> <sup>-/-</sup><br>shLuc (3),<br>shCdk5 (3)                        | Mice per<br>group | Error bars are<br>mean±SEM | shLuc <i>Trpm2</i> <sup>+/+</sup> vs<br>shLuc <i>Trpm2</i> <sup>-/-</sup><br>p=0.005;<br>shLuc <i>Trpm2</i> <sup>-/-</sup> vs<br>shCdk5 <i>Trpm2</i> <sup>-/-</sup><br>p=0.0029                                                                                                                           | shLuc <i>Trpm2</i> <sup>+/+</sup> vs<br>shLuc <i>Trpm2</i> <sup>-/-</sup><br>t(4)=-5.588;<br>shLuc <i>Trpm2</i> <sup>-/-</sup> vs<br>shCdk5 <i>Trpm2</i> <sup>-/-</sup><br>t(4)=6.472    |
| 5F      | Two-way<br>ANOVA                 | <b>Trpm2</b> <sup>+/+</sup><br>shLuc (13),<br>shCdk5 (16);<br><b>Trpm2</b> <sup>-/-</sup><br>shLuc (14),<br>shCdk5 (13)                    | Mice per<br>group | Error bars are<br>mean±SEM | Genotype x<br>Knockdown<br>interaction p=0.0015;<br>Genotype p=0.0383;<br>Knockdown p=0.0698<br><br>Bonferroni posttest:<br>shLuc <i>Trpm2</i> <sup>+/+</sup> vs<br>shLuc <i>Trpm2</i> <sup>-/-</sup><br>p<0.001;<br>shLuc <i>Trpm2</i> <sup>-/-</sup> vs<br>shCdk5 <i>Trpm2</i> <sup>-/-</sup><br>p<0.01 | Genotype x<br>Knockdown<br>interaction<br>F(1,52)=11.19;<br>Genotype<br>F(1,52)=4.52;<br>Knockdown<br>F(1,52)=3.428                                                                      |
| 5G      | Two-way<br>ANOVA                 | <b>Trpm2</b> <sup>+/+</sup><br>shLuc (12),<br>shCdk5 (17);<br><b>Trpm2</b> <sup>-/-</sup><br>shLuc (14),<br>shCdk5 (13)                    | Mice per<br>group | Error bars are<br>mean±SEM | Genotype x<br>Knockdown<br>interaction p=0.0026;<br>Genotype p=0.7032;<br>Knockdown p=0.1292<br><br>Bonferroni posttest:<br>shLuc <i>Trpm2</i> <sup>+/+</sup> vs<br>shLuc <i>Trpm2</i> <sup>-/-</sup><br>p<0.05;<br>shLuc <i>Trpm2</i> <sup>-/-</sup> vs<br>shCdk5 <i>Trpm2</i> <sup>-/-</sup><br>p<0.01  | Genotype x<br>Knockdown<br>interaction<br>F(1,52)=10.03;<br>Genotype<br>F(1,52)=0.1467;<br>Knockdown<br>F(1,52)=2.377                                                                    |
| 5H      | Two-way<br>ANOVA                 | <b>Trpm2</b> <sup>+/+</sup><br>shLuc (8),<br>shCdk5 (8);<br><b>Trpm2</b> <sup>-/-</sup><br>shLuc (8),<br>shCdk5 (8)                        | Mice per<br>group | Error bars are<br>mean±SEM | Genotype x<br>Knockdown<br>interaction p=0.4445;<br>Genotype p=0.9258;<br>Knockdown p=0.0007<br><br>Bonferroni posttest:<br>shLuc <i>Trpm2</i> <sup>-/-</sup> vs<br>shCdk5 <i>Trpm2</i> <sup>-/-</sup><br>p<0.01                                                                                          | Genotype x<br>Knockdown<br>interaction<br>F(1,28)=0.6017;<br>Genotype<br>F(1,28)=0.0088;<br>Knockdown<br>F(1,28)=14.41                                                                   |
|         | Unpaired<br>two-tailed t<br>test | <b>Trpm2</b> <sup>+/+</sup><br>shLuc (8),<br>shCdk5 (8);<br><b>Trpm2</b> <sup>-/-</sup><br>shLuc (8),<br>shCdk5 (8)                        | Mice per<br>group | Error bars are<br>mean±SEM | shLuc <i>Trpm2</i> <sup>+/+</sup> vs<br>shCdk5 <i>Trpm2</i> <sup>+/+</sup><br>p=0.014;<br>shLuc <i>Trpm2</i> <sup>-/-</sup> vs<br>shCdk5 <i>Trpm2</i> <sup>-/-</sup><br>p=0.0319                                                                                                                          | shLuc <i>Trpm2</i> <sup>+/+</sup> vs<br>shCdk5 <i>Trpm2</i> <sup>+/+</sup><br>t(11)=-2.916;<br>shLuc <i>Trpm2</i> <sup>-/-</sup> vs<br>shCdk5 <i>Trpm2</i> <sup>-/-</sup><br>t(7)=-2.672 |
| S2B     | Two-way<br>ANOVA                 | <b>Hippocampus</b><br><b>Trpm2</b> <sup>+/+</sup> (2),<br><b>Trpm2</b> <sup>-/-</sup> (2);<br><b>DG</b><br><b>Trpm2</b> <sup>+/+</sup> (3) | Mice per<br>group | Error bars are<br>mean±SEM | Genotype x Sub-region<br>interaction p=0.0011;<br>Genotype p<0.0001;<br>Sub-region p=0.0016                                                                                                                                                                                                               | Genotype x Sub-<br>region interaction<br>F(1,7)=28.01;<br>Genotype<br>F(1,7)=89.63; Sub-                                                                                                 |

|                  |                                  |                                                                                                                                                                              |                   |                            |                                                                                                                                                                                                                                                                                                                                                                                            |                                                                                                          |
|------------------|----------------------------------|------------------------------------------------------------------------------------------------------------------------------------------------------------------------------|-------------------|----------------------------|--------------------------------------------------------------------------------------------------------------------------------------------------------------------------------------------------------------------------------------------------------------------------------------------------------------------------------------------------------------------------------------------|----------------------------------------------------------------------------------------------------------|
|                  |                                  | <i>Trpm2</i> <sup>-/-</sup> (4)                                                                                                                                              |                   |                            | Bonferroni posttest:<br>Hippocampus<br><i>Trpm2</i> <sup>+/+</sup> vs<br>Hippocampus<br><i>Trpm2</i> <sup>-/-</sup> p<0.001; DG<br><i>Trpm2</i> <sup>+/+</sup> vs DG<br><i>Trpm2</i> <sup>-/-</sup> p<0.05;<br>Hippocampus<br><i>Trpm2</i> <sup>+/+</sup> vs DG<br><i>Trpm2</i> <sup>+/+</sup> p<0.001                                                                                     | region F(1,7)=24.95                                                                                      |
| S2F<br>(block2)  | Unpaired<br>two-tailed t<br>test | <b>Home cage</b><br><i>Trpm2</i> <sup>+/+</sup> (15),<br><i>Trpm2</i> <sup>-/-</sup> (15)                                                                                    | Mice per<br>group | Error bars are<br>mean±SEM | Home cage <i>Trpm2</i> <sup>+/+</sup><br>vs Home cage<br><i>Trpm2</i> <sup>-/-</sup><br>p=0.0355                                                                                                                                                                                                                                                                                           | Home cage <i>Trpm2</i> <sup>+/+</sup><br>vs Home cage<br><i>Trpm2</i> <sup>-/-</sup><br>t(28)= -2.2097   |
| S2F<br>(block3)  | Unpaired<br>two-tailed t<br>test | <b>Home cage</b><br><i>Trpm2</i> <sup>+/+</sup> (15),<br><i>Trpm2</i> <sup>-/-</sup> (15)                                                                                    | Mice per<br>group | Error bars are<br>mean±SEM | Home cage <i>Trpm2</i> <sup>+/+</sup><br>vs Home cage<br><i>Trpm2</i> <sup>-/-</sup><br>p=0.0089                                                                                                                                                                                                                                                                                           | Home cage <i>Trpm2</i> <sup>+/+</sup><br>vs Home cage<br><i>Trpm2</i> <sup>-/-</sup><br>t(28)= -2.8135   |
| S2G<br>(block2)  | Unpaired<br>two-tailed t<br>test | <b>Home cage</b><br><i>Trpm2</i> <sup>+/+</sup> (15),<br><i>Trpm2</i> <sup>-/-</sup> (15)                                                                                    | Mice per<br>group | Error bars are<br>mean±SEM | Home cage <i>Trpm2</i> <sup>+/+</sup><br>vs Home cage<br><i>Trpm2</i> <sup>-/-</sup><br>p=0.0352                                                                                                                                                                                                                                                                                           | Home cage <i>Trpm2</i> <sup>+/+</sup><br>vs Home cage<br><i>Trpm2</i> <sup>-/-</sup><br>t(28)= -2.2139   |
| S2G<br>(block3)  | Unpaired<br>two-tailed t<br>test | <b>Home cage</b><br><i>Trpm2</i> <sup>+/+</sup> (15),<br><i>Trpm2</i> <sup>-/-</sup> (15)                                                                                    | Mice per<br>group | Error bars are<br>mean±SEM | Home cage <i>Trpm2</i> <sup>+/+</sup><br>vs Home cage<br><i>Trpm2</i> <sup>-/-</sup><br>p=0.00923                                                                                                                                                                                                                                                                                          | Home cage <i>Trpm2</i> <sup>+/+</sup><br>vs Home cage<br><i>Trpm2</i> <sup>-/-</sup><br>t(28)= -2.7966   |
| S2H<br>(block4)  | Unpaired<br>two-tailed t<br>test | <b>Home cage</b><br><i>Trpm2</i> <sup>+/+</sup> (15),<br><i>Trpm2</i> <sup>-/-</sup> (15)                                                                                    | Mice per<br>group | Error bars are<br>mean±SEM | Home cage <i>Trpm2</i> <sup>+/+</sup><br>vs Home cage<br><i>Trpm2</i> <sup>-/-</sup><br>p=0.00875                                                                                                                                                                                                                                                                                          | Home cage <i>Trpm2</i> <sup>+/+</sup><br>vs Home cage<br><i>Trpm2</i> <sup>-/-</sup><br>t(19)= -2.9218   |
| S4B              | Student's<br>t-test              | <i>Trpm2</i> <sup>+/+</sup> (3);<br><i>Trpm2</i> <sup>-/-</sup> (3)                                                                                                          | Mice per<br>group | Error bars are<br>mean±SEM | p=0.0090                                                                                                                                                                                                                                                                                                                                                                                   | t(4)=-3.873                                                                                              |
| S4D              | Two-way<br>ANOVA                 | <b>Home cage</b><br><i>Trpm2</i> <sup>+/+</sup> (5),<br><i>Trpm2</i> <sup>-/-</sup> (5);<br><b>CUS</b><br><i>Trpm2</i> <sup>+/+</sup> (4)<br><i>Trpm2</i> <sup>-/-</sup> (5) | Mice per<br>group | Error bars are<br>mean±SEM | Genotype x Stress<br>interaction p=0.0371;<br>Genotype p<0.0001;<br>Stress p=0.0041<br><br>Bonferroni posttest:<br>Home cage <i>Trpm2</i> <sup>+/+</sup><br>vs CUS <i>Trpm2</i> <sup>+/+</sup><br>p<0.01;<br>Home cage <i>Trpm2</i> <sup>+/+</sup><br>vs Home cage<br><i>Trpm2</i> <sup>-/-</sup> p<0.05; CUS<br><i>Trpm2</i> <sup>+/+</sup> vs CUS<br><i>Trpm2</i> <sup>-/-</sup> p<0.001 | Genotype x Stress<br>interaction<br>F(1,15)=5.231;<br>Genotype<br>F(1,15)=40.27; Stress<br>F(1,15)=11.46 |
| S4H              | Student's<br>t-test              | <i>Trpm2</i> <sup>+/+</sup> (5);<br><i>Trpm2</i> <sup>-/-</sup> (5)                                                                                                          | Mice per<br>group | Error bars are<br>mean±SEM | p=0.02897                                                                                                                                                                                                                                                                                                                                                                                  | t(8)=-2.212                                                                                              |
| S4I              | Student's<br>t-test              | <i>Trpm2</i> <sup>+/+</sup> (5);<br><i>Trpm2</i> <sup>-/-</sup> (5)                                                                                                          | Mice per<br>group | Error bars are<br>mean±SEM | p=0.02680                                                                                                                                                                                                                                                                                                                                                                                  | t(8)=-2.262                                                                                              |
| S5A<br>(Cdk5)    | Student's<br>t-test              | <i>Trpm2</i> <sup>+/+</sup> (2);<br><i>Trpm2</i> <sup>-/-</sup> (2)                                                                                                          | Mice per<br>group | Error bars are<br>mean±SEM | p=0.0172                                                                                                                                                                                                                                                                                                                                                                                   | t(2)=-5.250                                                                                              |
| S5A<br>(p25/p35) | Student's<br>t-test              | <i>Trpm2</i> <sup>+/+</sup> (2);<br><i>Trpm2</i> <sup>-/-</sup> (2)                                                                                                          | Mice per<br>group | Error bars are<br>mean±SEM | p=0.0353                                                                                                                                                                                                                                                                                                                                                                                   | t(2)=3.560                                                                                               |
| S5B              | Student's<br>t-test              | <i>Trpm2</i> <sup>+/+</sup> (3);<br><i>Trpm2</i> <sup>-/-</sup> (3)                                                                                                          | Mice per<br>group | Error bars are<br>mean±SEM | p=0.0069                                                                                                                                                                                                                                                                                                                                                                                   | t(4)=-4.191                                                                                              |
| S5C              | Student's<br>t-test              | <i>Trpm2</i> <sup>+/+</sup> (5);<br><i>Trpm2</i> <sup>-/-</sup> (5)                                                                                                          | Mice per<br>group | Error bars are<br>mean±SEM | p=0.0016                                                                                                                                                                                                                                                                                                                                                                                   | t(8)=-4.144                                                                                              |
| S6A<br>(Cdk5)    | Student's<br>t-test              | <i>Trpm2</i> <sup>+/+</sup> (3);<br><i>Trpm2</i> <sup>-/-</sup> (3)                                                                                                          | Mice per<br>group | Error bars are<br>mean±SEM | p=0.0033                                                                                                                                                                                                                                                                                                                                                                                   | t(4)=-5.198                                                                                              |
| S6A<br>(p35)     | Student's<br>t-test              | <i>Trpm2</i> <sup>+/+</sup> (3);<br><i>Trpm2</i> <sup>-/-</sup> (3)                                                                                                          | Mice per<br>group | Error bars are<br>mean±SEM | p=0.0002                                                                                                                                                                                                                                                                                                                                                                                   | t(4)=-10.784                                                                                             |
| S6B<br>(GSK3β)   | Student's<br>t-test              | <i>Trpm2</i> <sup>+/+</sup> (7);<br><i>Trpm2</i> <sup>-/-</sup> (7)                                                                                                          | Mice per<br>group | Error bars are<br>mean±SEM | p=0.0324                                                                                                                                                                                                                                                                                                                                                                                   | t(12)=-2.032                                                                                             |

|                  |                            |                                                                                                                                                                                 |                |                         |                                                                                                                                                                                                                                           |                                                                                                                                             |
|------------------|----------------------------|---------------------------------------------------------------------------------------------------------------------------------------------------------------------------------|----------------|-------------------------|-------------------------------------------------------------------------------------------------------------------------------------------------------------------------------------------------------------------------------------------|---------------------------------------------------------------------------------------------------------------------------------------------|
| S7A<br>(p25/p35) | One-way ANOVA              | <i>Trpm2</i> <sup>+/+</sup><br>Control (4);<br>H <sub>2</sub> O <sub>2</sub> 700 μM (3);<br>H <sub>2</sub> O <sub>2</sub> 1 mM (4);<br>H <sub>2</sub> O <sub>2</sub> 10 mM (3)  | Mice per group | Error bars are mean±SEM | p=0.0003<br><br>Bonferroni posttest:<br><i>Trpm2</i> <sup>+/+</sup><br>Control vs 1 mM<br>p<0.05;<br><i>Trpm2</i> <sup>+/+</sup><br>Control vs 10 mM<br>p<0.001                                                                           | F(3,10)=16.62                                                                                                                               |
| S7B<br>(SYN1)    | One-way ANOVA              | <i>Trpm2</i> <sup>+/+</sup><br>Control (3);<br>H <sub>2</sub> O <sub>2</sub> 700 μM (3);<br>H <sub>2</sub> O <sub>2</sub> 1 mM (3);<br>H <sub>2</sub> O <sub>2</sub> 10 mM (3)  | Mice per group | Error bars are mean±SEM | p<0.0001<br><br>Bonferroni posttest:<br><i>Trpm2</i> <sup>+/+</sup><br>Control vs 1 mM<br>p<0.05;<br><i>Trpm2</i> <sup>+/+</sup><br>Control vs 10 mM<br>p<0.001                                                                           | F(3,8)=33.72                                                                                                                                |
| S7B<br>(HDAC5)   | One-way ANOVA              | <i>Trpm2</i> <sup>+/+</sup><br>Control (3);<br>H <sub>2</sub> O <sub>2</sub> 700 μM (3);<br>H <sub>2</sub> O <sub>2</sub> 1 mM (3);<br>H <sub>2</sub> O <sub>2</sub> 10 mM (3)  | Mice per group | Error bars are mean±SEM | p=0.017<br><br>Bonferroni posttest:<br><i>Trpm2</i> <sup>+/+</sup><br>Control vs 10 mM<br>p<0.05                                                                                                                                          | F(3,8)=6.274                                                                                                                                |
| S8A              | Student's t-test           | <i>Trpm2</i> <sup>+/+</sup> (3);<br><i>Trpm2</i> <sup>-/-</sup> (3)                                                                                                             | Mice per group | Error bars are mean±SEM | p=0.0004                                                                                                                                                                                                                                  | t(4)=8.933                                                                                                                                  |
| S8B              | Two-way ANOVA              | <b>DMSO</b><br><i>Trpm2</i> <sup>+/+</sup> (3),<br><i>Trpm2</i> <sup>-/-</sup> (3);<br><b>Roscovitine</b><br><i>Trpm2</i> <sup>+/+</sup> (3)<br><i>Trpm2</i> <sup>-/-</sup> (3) | Mice per group | Error bars are mean±SEM | Genotype x Durg interaction p=0.6927;<br>Genotype p=0.5582;<br>Durg p=0.0022<br><br>Bonferroni posttest:<br><i>Trpm2</i> <sup>+/+</sup><br>DMSO vs Roscovitine<br>p<0.05;<br><i>Trpm2</i> <sup>-/-</sup><br>DMSO vs Roscovitine<br>p<0.05 | Genotype x Drug interaction<br>F(1,8)=0.168;<br>Genotype<br>F(1,8)=0.3731;<br>Drug F(1,8)=19.53                                             |
|                  | Unpaired two-tailed t test | <b>DMSO</b><br><i>Trpm2</i> <sup>+/+</sup> (3),<br><i>Trpm2</i> <sup>-/-</sup> (3);<br><b>Roscovitine</b><br><i>Trpm2</i> <sup>+/+</sup> (3)<br><i>Trpm2</i> <sup>-/-</sup> (3) | Mice per group | Error bars are mean±SEM | <i>Trpm2</i> <sup>+/+</sup><br>DMSO vs Roscovitine<br>p=0.0354;<br><br><i>Trpm2</i> <sup>-/-</sup><br>DMSO vs Roscovitine<br>p=0.0346                                                                                                     | <i>Trpm2</i> <sup>+/+</sup><br>DMSO vs Roscovitine<br>t(4)=-3.123;<br><br><i>Trpm2</i> <sup>-/-</sup><br>DMSO vs Roscovitine<br>t(4)=-3.149 |
| S9B<br>(SYN1)    | One-way ANOVA              | No infection (2); shLuc (2);<br>shTRPM2 1 (2), 5 (2), 25 (2)                                                                                                                    | Mice per group | Error bars are mean±SEM | p=0.0096<br><br>Bonferroni posttest:<br>No infection vs<br>shTRPM2 25 p<0.05                                                                                                                                                              | F(4,5)=11.61                                                                                                                                |
| S9B<br>(HDAC5)   | One-way ANOVA              | No infection (3); shLuc (2);<br>shTRPM2 1 (3), 5 (2), 25 (2)                                                                                                                    | Mice per group | Error bars are mean±SEM | p=0.0064<br><br>Bonferroni posttest:<br>No infection vs<br>shTRPM2 5 p<0.05;<br>No infection vs<br>shTRPM2 25 p<0.05                                                                                                                      | F(4,7)=9.198                                                                                                                                |
| S10A<br>(NR1)    | Student's t-test           | <i>Trpm2</i> <sup>+/+</sup> (7);<br><i>Trpm2</i> <sup>-/-</sup> (7)                                                                                                             | Mice per group | Error bars are mean±SEM | p=0.0064                                                                                                                                                                                                                                  | t(12)= -2.918                                                                                                                               |
| S10A<br>(NR2B)   | Student's t-test           | <i>Trpm2</i> <sup>+/+</sup> (6);<br><i>Trpm2</i> <sup>-/-</sup> (6)                                                                                                             | Mice per group | Error bars are mean±SEM | p=0.0042                                                                                                                                                                                                                                  | t(10)= -3.275                                                                                                                               |

|               |                            |                                                                                                                                         |                |                         |                                                                                                                                                                                                      |                                                                                                                                                                                                             |
|---------------|----------------------------|-----------------------------------------------------------------------------------------------------------------------------------------|----------------|-------------------------|------------------------------------------------------------------------------------------------------------------------------------------------------------------------------------------------------|-------------------------------------------------------------------------------------------------------------------------------------------------------------------------------------------------------------|
| S10A (GluR2)  | Student's t-test           | <i>Trpm2</i> <sup>+/+</sup> (6);<br><i>Trpm2</i> <sup>-/-</sup> (6)                                                                     | Mice per group | Error bars are mean±SEM | p=0.0001                                                                                                                                                                                             | t(10)= -5.444                                                                                                                                                                                               |
| S10A (Shank2) | Student's t-test           | <i>Trpm2</i> <sup>+/+</sup> (6);<br><i>Trpm2</i> <sup>-/-</sup> (6)                                                                     | Mice per group | Error bars are mean±SEM | p=0.0017                                                                                                                                                                                             | t(10)= -3.824                                                                                                                                                                                               |
| S11A          | Student's t-test           | shLuc (2);<br>shCdk5 (2)                                                                                                                | Mice per group | Error bars are mean±SEM | p=0.0285                                                                                                                                                                                             | t(2)=-4.004                                                                                                                                                                                                 |
| S13B          | Unpaired two-tailed t test | <b>CUS <i>Trpm2</i><sup>+/+</sup></b><br>shLuc (7),<br>shCdk5 (7);<br><b>CUS <i>Trpm2</i><sup>-/-</sup></b><br>shLuc (6),<br>shCdk5 (8) | Mice per group | Error bars are mean±SEM | CUS shLuc <i>Trpm2</i> <sup>-/-</sup><br>vs CUS shCdk5<br><i>Trpm2</i> <sup>-/-</sup> p=0.0635                                                                                                       | CUS shLuc <i>Trpm2</i> <sup>-/-</sup><br>vs CUS shCdk5<br><i>Trpm2</i> <sup>-/-</sup> t(12)=2.045                                                                                                           |
| S13C          | Unpaired two-tailed t test | <b>CUS <i>Trpm2</i><sup>+/+</sup></b><br>shLuc (7),<br>shCdk5 (7);<br><b>CUS <i>Trpm2</i><sup>-/-</sup></b><br>shLuc (6),<br>shCdk5 (8) | Mice per group | Error bars are mean±SEM | CUS shLuc <i>Trpm2</i> <sup>-/-</sup><br>vs CUS shCdk5<br><i>Trpm2</i> <sup>-/-</sup> p=0.0298                                                                                                       | CUS shLuc <i>Trpm2</i> <sup>-/-</sup><br>vs CUS shCdk5<br><i>Trpm2</i> <sup>-/-</sup> t(12)=-2.464                                                                                                          |
| S13D          | Unpaired two-tailed t test | <b>CUS <i>Trpm2</i><sup>+/+</sup></b><br>shLuc (7),<br>shCdk5 (7);<br><b>CUS <i>Trpm2</i><sup>-/-</sup></b><br>shLuc (6),<br>shCdk5 (8) | Mice per group | Error bars are mean±SEM | CUS shLuc <i>Trpm2</i> <sup>+/+</sup><br>vs CUS shLuc<br><i>Trpm2</i> <sup>-/-</sup> p=0.0017;<br><br>CUS shLuc <i>Trpm2</i> <sup>-/-</sup><br>vs CUS shCdk5<br><i>Trpm2</i> <sup>-/-</sup> p=0.0004 | CUS shLuc <i>Trpm2</i> <sup>+/+</sup><br>vs CUS shLuc<br><i>Trpm2</i> <sup>-/-</sup> t(11)=4.134;<br><br>CUS shLuc <i>Trpm2</i> <sup>-/-</sup><br>vs CUS shCdk5<br><i>Trpm2</i> <sup>-/-</sup> t(12)=-4.789 |
| S13E          | Unpaired two-tailed t test | <b>CUS <i>Trpm2</i><sup>+/+</sup></b><br>shLuc (7),<br>shCdk5 (7);<br><b>CUS <i>Trpm2</i><sup>-/-</sup></b><br>shLuc (6),<br>shCdk5 (8) | Mice per group | Error bars are mean±SEM | CUS shLuc <i>Trpm2</i> <sup>+/+</sup><br>vs CUS shLuc<br><i>Trpm2</i> <sup>-/-</sup> p=0.014;<br><br>CUS shLuc <i>Trpm2</i> <sup>-/-</sup><br>vs CUS shCdk5<br><i>Trpm2</i> <sup>-/-</sup> p=0.0085  | CUS shLuc <i>Trpm2</i> <sup>+/+</sup><br>vs CUS shLuc<br><i>Trpm2</i> <sup>-/-</sup> t(7)=3.254;<br><br>CUS shLuc <i>Trpm2</i> <sup>-/-</sup><br>vs CUS shCdk5<br><i>Trpm2</i> <sup>-/-</sup> t(8)=-3.466   |

**Table S2. Experimental schedule for the CUS procedure in mice**

| Stressors / Duration                   | Day                              |
|----------------------------------------|----------------------------------|
| Restraint / 1 h                        | 1, 6, 10, 15, 18                 |
| Light on / Overnight                   | 2, 7, 9, 16, 24                  |
| Cage tilt / Overnight                  | 1, 11, 15, 20, 26                |
| Cage rotation (overcrowding) / 1 h     | 2, 9, 14, 22, 28                 |
| Wet bedding (overcrowding) / Overnight | 5, 12, 14, 18, 22                |
| Light off / 3 h                        | 4, 7, 11, 14, 16, 17, 21, 22, 24 |
| Strobe / Overnight                     | 6, 10, 17, 21, 23, 27            |
| Cold (4 °C) / 1 h                      | 3, 5, 13, 16, 20, 27             |
| Food deprivation / Overnight           | 3, 8, 13, 19, 25, 28             |
| Overcrowding / Overnight               | 4, 9, 22                         |
| Different partner / 3 h                | 8, 12, 19, 23, 26                |



**Table S3. Primary antibodies used in western blotting and immunohistochemistry**

| Antigen              | Manufacturer                                                                                 | Host, Clonality   | Catalog number | Dilution |
|----------------------|----------------------------------------------------------------------------------------------|-------------------|----------------|----------|
| TRPM2                | Novus Biologicals                                                                            | Rabbit polyclonal | NB110-82364    | 1:1,000  |
| PAR                  | Santa Cruz Biotechnology                                                                     | Mouse monoclonal  | sc-71848       | 1:1,000  |
| Cdk5                 | Abcam                                                                                        | Mouse monoclonal  | ab28441        | 1:1,000  |
| Cdk5                 | Santa Cruz Biotechnology                                                                     | Rabbit polyclonal | sc-173         | 1:1,000  |
| p35/p25              | Santa Cruz Biotechnology                                                                     | Rabbit polyclonal | sc-820         | 1:1,000  |
| Spectrin $\alpha$ II | Santa Cruz Biotechnology                                                                     | Mouse monoclonal  | sc-46696       | 1:1,000  |
| p-Synapsin1 (Ser553) | Santa Cruz Biotechnology                                                                     | Goat polyclonal   | sc-12913       | 1:1,000  |
| Synapsin1            | Cell Signaling Technology                                                                    | Rabbit monoclonal | #5297          | 1:1,000  |
| p-HDAC5 (Ser279)     | A kind gift from Christopher W. Cowan (University of Texas Southwestern Medical Center, USA) |                   |                | 1:1,000  |
| HDAC5                | Cell Signaling Technology                                                                    | Rabbit polyclonal | #2082          | 1:500    |
| Nrf2                 | Santa Cruz Biotechnology                                                                     | Rabbit polyclonal | sc-13032       | 1:1,000  |
| LaminB1              | Abcam                                                                                        | Rabbit polyclonal | ab16048        | 1:1,000  |
| p-CaMKII (Thr286)    | Cell Signaling Technology                                                                    | Rabbit monoclonal | #12716         | 1:1,000  |
| CaMKII               | Cell Signaling Technology                                                                    | Rabbit polyclonal | #3362          | 1:1,000  |
| p-mTOR (Ser2448)     | Cell Signaling Technology                                                                    | Rabbit polyclonal | #2971          | 1:1,000  |
| mTOR                 | Cell Signaling Technology                                                                    | Rabbit monoclonal | #2983          | 1:1,000  |
| p-PKD (Ser744/748)   | Cell Signaling Technology                                                                    | Rabbit polyclonal | #2054          | 1:500    |
| PKD                  | ABM                                                                                          | Rabbit polyclonal | Y021126        | 1:1,000  |

|                             |                                                                  |                   |             |         |
|-----------------------------|------------------------------------------------------------------|-------------------|-------------|---------|
| p-ERK1/2<br>(Thr202/Tyr204) | Cell Signaling<br>Technology                                     | Mouse monoclonal  | #9106       | 1:1,000 |
| ERK1/2                      | Cell Signaling<br>Technology                                     | Rabbit polyclonal | #9102       | 1:1,000 |
| p-Akt (Ser473)              | Cell Signaling<br>Technology                                     | Rabbit polyclonal | #9271       | 1:1,000 |
| Akt                         | Cell Signaling<br>Technology                                     | Rabbit polyclonal | #9272       | 1:1,000 |
| p-GSK3 $\beta$ (Ser9)       | Cell Signaling<br>Technology                                     | Rabbit polyclonal | #9336       | 1:1,000 |
| GSK3 $\beta$                | Cell Signaling<br>Technology                                     | Rabbit monoclonal | #9315       | 1:1,000 |
| p-Prx2 (Thr89)              | A kind gift from David S. Park (University of Ottawa,<br>Canada) |                   |             | 1:500   |
| Prx2                        | R&D Systems                                                      | Mouse monoclonal  | MAB3489     | 1:1,000 |
| PSD95                       | Cell Signaling<br>Technology                                     | Rabbit polyclonal | #2507       | 1:1,000 |
| NR1                         | Upstate                                                          | Mouse monoclonal  | 05-432      | 1:1,000 |
| NR2B                        | Chemicon                                                         | Rabbit polyclonal | AB1557P     | 1:1,000 |
| GluR1                       | Abcam                                                            | Rabbit polyclonal | Ab31232     | 1:1,000 |
| GluR2                       | Millipore                                                        | Rabbit polyclonal | AB1768-I    | 1:1,000 |
| Shank2                      | Santa Cruz<br>Biotechnology                                      | Rabbit polyclonal | sc-30192    | 1:500   |
| $\beta$ actin               | Santa Cruz<br>Biotechnology                                      | Mouse monoclonal  | sc-47778    | 1:2,000 |
| GFP                         | Roche                                                            | Mouse monoclonal  | 11814460001 | 1:200   |
| TRPM2                       | Novus<br>Biologicals                                             | Rabbit polyclonal | NB500-242   | 1:200   |
| MAP2                        | Sigma Aldrich                                                    | Mouse monoclonal  | M1406       | 1:500   |
| BrdU                        | Abcam                                                            | Rat monoclonal    | ab6326      | 1:300   |
| NeuN                        | Chemicon                                                         | Mouse monoclonal  | MAB377      | 1:200   |

|           |                             |                   |           |       |
|-----------|-----------------------------|-------------------|-----------|-------|
| GFAP      | Dako                        | Rabbit polyclonal | Z0334     | 1:200 |
| Calbindin | Santa Cruz<br>Biotechnology | Mouse monoclonal  | sc-365360 | 1:100 |

---

**Table S4. Primer sequences for qPCR**

| Gene                            | 5' ----- Forward ----- 3' | 5' ----- Reverse ----- 3' |
|---------------------------------|---------------------------|---------------------------|
| <i><math>\beta</math>-actin</i> | AAGGCCAACCGTGAAAAGAT      | GTGGTACGACCAGAGGCATAC     |
| <i>Trpm2</i>                    | TTGGGGCCATTCTGCTCTTC      | AGACGTCCTTCATCATCCGC      |
| <i>Trpm7</i>                    | GGTTCCTCCTGTGGTGCCTT      | CCCCATGTCGTCTCTGTCGT      |
| <i>Trpc3</i>                    | GCCAAGCGACGGAGGAATTA      | CAGCACACTGGGGTTCAGTT      |
| <i>Trpc5</i>                    | GGAGATAAAGGAAATGTGGGATGGT | AATAGTTGCCAGGTAGAGGGAGT   |
| <i>Trpa1</i>                    | TGCTGCAGAAAAAATCAAGTTGA   | CCTTGGCTGAGAAGAACTTTACACT |
| <i>Iba1</i>                     | CAGACTGCCAGCCTAAGACA      | AGGAATTGCTTGTTGATCCC      |
| <i>HMGB1</i>                    | GGCTGACAAGGCTCGTTATG      | GGGCGGTACTCAGAACAGAA      |
| <i>MMP9</i>                     | CTTCTGGCGTGTGAGTTTCCA     | ACTGCACGGTTGAAGCAAAGA     |
| <i>TNF<math>\alpha</math></i>   | TGGCCCAGACCCTCACACTCAG    | ACCCATCGGCTGGCACCCT       |
| <i>COX-2</i>                    | CCAGCACTTCACCCATCAGTT     | ACCCAGGTCCTCGCTTATGA      |
| <i>IL-6</i>                     | ATGGATGCTACCAAACCTGGAT    | TGAAGGACTCTGGCTTTGTCT     |

**Table S5. Demographic information between the subjects with MDD and the controls**

|                             | <b>Control</b> | <b>MDD</b> | <b><i>p</i>-value</b> |
|-----------------------------|----------------|------------|-----------------------|
| n                           | 12             | 8          |                       |
| Gender                      |                |            | 1.000 <sup>a</sup>    |
| Male                        | 6              | 4          |                       |
| Female                      | 6              | 4          |                       |
| Age (years)                 |                |            | 1.000 <sup>a</sup>    |
| ≤ 50                        | 7              | 5          |                       |
| > 50                        | 5              | 3          |                       |
| PMI (hours)<br>(mean ± SEM) | 18.3 ± 5.3     | 21.7 ± 6.1 | 0.219 <sup>b</sup>    |
| pH<br>(mean ± SEM)          | 6.7 ± 0.2      | 6.7 ± 0.3  | 0.799 <sup>c</sup>    |
| RIN<br>(mean ± SEM)         | 7.5 ± 0.7      | 7.7 ± 0.7  | 0.588 <sup>b</sup>    |

<sup>a</sup>Fisher's exact test; <sup>b</sup>Student's t-test; <sup>c</sup>Mann-Whitney test  
MDD = Major depressive disorder; PMI = Postmortem interval; RIN = RNA Integrity Number

## Supplemental Figure Legends

**Figure S1. TRPM2 levels are increased in the hippocampus of patients with MDD.** **(A)** Using the criteria described in Materials and Methods, we identified a total of 1,198 differentially-expressed genes (DEGs) in patients with MDD. Of these genes, 700 were up-regulated and 498 were down-regulated. The top 100 significantly up- or down-regulated genes are displayed in the heat-map. Blue, low expression; red, high expression. Red arrow indicated TRPM2. **(B)** Microarray analysis of post-mortem MDD hippocampal samples confirms the alterations in oxidative stress-sensitive TRP channels in the MDD hippocampus. **(C–G)** Box plots displaying the data shown in S1B. TRPM2 **(C)** is up-regulated in post-mortem hippocampal tissue from subjects with MDD. The expression of TRPM7 **(D)**, TRPA1 **(E)**, TRPC3 **(F)** and TRPC5 **(G)** is not changed. Using appropriate sample selection criteria, we performed gene expression analyses on 20 hippocampus samples from 8 patients with MDD and 12 controls. As shown in Table S5, there were no statistically significant differences in demographic characteristics between subjects and controls.

**Figure S2. Molecular and behavioral characterization of *Trpm2*<sup>-/-</sup> mice.** (A) PCR analysis for genotyping showed disruption of the *Trpm2* gene in *Trpm2*<sup>-/-</sup> mice. Lanes 1 – 2, PCR products from *Trpm2*<sup>+/+</sup>; lanes 3 – 4, from *Trpm2*<sup>+/-</sup>; lanes 5 – 6, from *Trpm2*<sup>-/-</sup> mice. (B) *Trpm2* mRNA levels were quantitated by real-time PCR. Expression of *Trpm2* mRNA was not detected in the whole hippocampus and DG of *Trpm2*<sup>-/-</sup> mice ( $n = 2$  to 4 per group; genotype x sub-region interaction  $F_{1,7} = 28.01$ ,  $p = 0.0011$ , two-way ANOVA followed by Bonferroni posttest). (C) Average speed, (D) total distance travelled and (E) time in the center zone were scored for locomotor activities over each 5 min period ( $n = 15$  to 17 per group). CUS did not have any effects on locomotor activities of *Trpm2*<sup>+/+</sup> and *Trpm2*<sup>-/-</sup> mice. (F) Average speed, (G) total distance travelled and (H) time in the center zone were re-analyzed over 1 min blocks. Time segmentation showed that average speed and total distance travelled were slightly higher in *Trpm2*<sup>-/-</sup> mice than *Trpm2*<sup>+/+</sup> mice during the initial block of testing ( $n = 15$  to 17 per group, unpaired two-tailed  $t$  test). Data are means  $\pm$  SEM. \* $p < 0.05$ , \*\* $p < 0.01$ , \*\*\* $p < 0.001$ . Other statistical parameters with significant differences are listed in Table S1.

**Figure S3. Expression of TRPM2 in mouse hippocampal neurons.** (A) Representative confocal images of DG neurons labeled with DAPI (blue), MAP2 (green) and TRPM2 (red). Co-localization of TRPM2 and MAP2 represents TRPM2 expression in *Trpm2*<sup>+/+</sup> DG neurons. Scale bar, 50  $\mu\text{m}$ . (B) Representative confocal images of neural progenitor cells (NPCs) in the hippocampal DG labeled with TRPM2 (green) and BrdU (red). A double-labeled NPC was marked with a *white arrow* in the SGZ of DG. Scale bar, 20  $\mu\text{m}$ . (C) High power confocal image of a cell (white arrow in B). A merged image indicates expression of TRPM2 in proliferating BrdU<sup>+</sup> cells. The bottom and right panels showed images merged across the z- and x-axis, respectively. (D) Representative confocal images of cultured hippocampal neurons labeled with DAPI (blue), MAP2 (green) and TRPM2 (red). Co-localization of TRPM2 and MAP2 represents TRPM2 expression in *Trpm2*<sup>+/+</sup> mouse embryo hippocampal primary cultures. Scale bar, 20  $\mu\text{m}$ .



**Figure S4. TRPM2 deficiency enhances neurogenesis, but has no effect on astrocyte differentiation and inflammation in the adult mouse hippocampus.** (A) Experimental paradigm for proliferation of NPCs. Mice were sacrificed 1 day after the last BrdU administration. (B) Proliferating BrdU<sup>+</sup> cells (red) in the SGZ of DG (left). TRPM2 deficiency increased the number of BrdU<sup>+</sup> cells in the SGZ (right) ( $n = 3$  per group, student's  $t$  test). Scale bar, 200  $\mu\text{m}$ . (C) Timeline of experimental procedures for CUS and BrdU administration to evaluate survival of NPCs. (D) Mature neurons were double-labeled (white arrow) with NeuN<sup>+</sup> (green) BrdU<sup>+</sup> (red) in the granule cell layer (GCL) of DG (left). CUS significantly reduced the survival of NPCs in *Trpm2*<sup>+/+</sup> mice, but not in *Trpm2*<sup>-/-</sup> mice (right) ( $n = 4$  to 5 per group; genotype x stress interaction  $F_{1,15} = 5.231$ ,  $p = 0.0371$ , two-way ANOVA followed by Bonferroni posttest). Scale bar, 50  $\mu\text{m}$ . (E) Experimental paradigm for survival of NPCs. Mice were sacrificed 12 days after the last BrdU administration. (F) NPCs differentiated to astrocytes were double-labeled with GFAP<sup>+</sup> (green) BrdU<sup>+</sup> (red) in the DG (left). There was no significant difference in the ratio of NPCs to astrocyte differentiation between *Trpm2*<sup>+/+</sup> and *Trpm2*<sup>-/-</sup> mice (right) ( $n = 3$  per group). Scale bar, 100  $\mu\text{m}$ . (G) Hippocampal mRNA levels of genes related to glia and inflammation were quantitated by real-time PCR. There were no significant differences between *Trpm2*<sup>+/+</sup> and *Trpm2*<sup>-/-</sup> mice ( $n = 2$  to 3 per group). (H) Mature granule cells were double-labeled with BrdU<sup>+</sup> (red) and calbindin<sub>D28k</sub><sup>+</sup> (green) in the GCL of the DG (left). Increased colocalization of BrdU with calbindin<sub>D28k</sub> was seen in *Trpm2*<sup>-/-</sup> mice (right) ( $n = 5$  per group). Scale bar, 20  $\mu\text{m}$ . (I) The GCL area was outlined on mice hippocampal section (left). Quantification of the GCL volume (right). The volume of GCL was higher in *Trpm2*<sup>-/-</sup> mice than *Trpm2*<sup>+/+</sup> mice ( $n = 5$  per group). Scale bar, 200  $\mu\text{m}$ . Data are means  $\pm$  SEM. \* $p < 0.05$ , \*\* $p < 0.01$ , \*\*\* $p < 0.001$ . Other statistical parameters with significant differences are listed in Table S1.

**Figure S5. TRPM2 deficiency enhances Cdk5 activity.** (A) Representative immunoblots of the hippocampal DG lysates (left). TRPM2 deficiency increased Cdk5 protein levels and reduced cleavage of p35 to p25 quantified as the p25/p35 ratio (right) ( $n = 2$  per group, Student's  $t$  test). (B) Endogenous Cdk5 was immunoprecipitated from the hippocampi of  $Trpm2^{+/+}$  and  $Trpm2^{-/-}$  mice, and immunoblots were probed with the indicated antibodies (left). Cdk5 and p35 interaction was enhanced in  $Trpm2^{-/-}$  mice (right) ( $n = 3$  per group, Student's  $t$  test). (C) Cdk5 activity was detected by *in vivo* kinase assay (RLU, relative light units) ( $n = 4, 3$  for  $Trpm2^{+/+}$  and  $Trpm2^{-/-}$  mice, respectively, Student's  $t$  test). Data are means  $\pm$  SEM. \* $p < 0.05$ , \*\* $p < 0.01$ . Other statistical parameters with significant differences are listed in Table S1.

**Figure S6. Expression of Cdk5 and other protein kinases in the mouse hippocampal neurons.** (A) Representative immunoblots of the lysates from hippocampal primary cultures (left). Cdk5 and p35 protein levels were increased in *Trpm2*<sup>-/-</sup> neurons (right) (*n* = 3 per group, student's *t* test). (B) Immunoblots of phosphorylated and total forms of CaMKII, mTOR, PKD, ERK1/2, Akt and GSK3β in the adult mouse hippocampal DG (left). There were no significant differences between *Trpm2*<sup>+/+</sup> and *Trpm2*<sup>-/-</sup> mice except GSK3β (right) (*n* = 7 to 8 per group, Student's *t* test). Data are means ± SEM. \**p* < 0.05, \*\**p* < 0.01, \*\*\**p* < 0.001. Other statistical parameters with significant differences are listed in Table S1.

**Figure S7. TRPM2 deficiency blocks H<sub>2</sub>O<sub>2</sub>-induced p35 cleavage and the decrease in Cdk5-specific phosphorylation.** (A) Representative immunoblots of the lysates from hippocampal primary cultures treated with H<sub>2</sub>O<sub>2</sub> for 30 min (left). p35 cleavage was dose-dependently triggered by H<sub>2</sub>O<sub>2</sub> only in *Trpm2*<sup>+/+</sup> neurons, but not in *Trpm2*<sup>-/-</sup> neurons (right) (*n* = 3 to 4 per group). (B) Representative immunoblots of the lysates from mice hippocampal primary neurons treated with H<sub>2</sub>O<sub>2</sub> for 30 min (left). A dose-dependent decrease in Cdk5-specific phosphorylation of SYN1 and HDAC5 was observed in *Trpm2*<sup>+/+</sup> neurons, but not in *Trpm2*<sup>-/-</sup> neurons (right) (*n* = 3 per group). Data are means ± SEM. \**p* < 0.05, \*\*\**p* < 0.001. Other statistical parameters are listed in Table S1.

**Figure S8. TRPM2 mediates the stress-induced ROS response via Cdk5.** (A) Immunoblots of total and phosphorylated Prx2 in the hippocampus (left). TRPM2 deficiency reduced Cdk5-specific phosphorylation of Prx2 (right) ( $n = 3$  per group, Student's  $t$  test). (B) Immunoblots of PAR in mice hippocampal primary cultures treated with roscovitine (50  $\mu\text{M}$ ; Calbiochem) for 12 h (left). Roscovitine induced PAR formation in cultured neurons from both  $Trpm2^{+/+}$  and  $Trpm2^{-/-}$  mice (right) ( $n = 3$  per group, unpaired two-tailed  $t$  test). Data are means  $\pm$  SEM.  $*p < 0.05$ ,  $***p < 0.001$ . Other statistical parameters are listed in Table S1.

**Figure S9. Knockdown of TRPM2 increases Cdk5-specific phosphorylation.** (A) Lentiviral vector expressing small hairpin RNAs (shRNAs) targeted against mouse TRPM2 (lenti-shTRPM2). (B) Representative immunoblots of the lysates from mice hippocampal primary neurons infected with lenti-shTRPM2 (left). Cdk5-specific phosphorylation of SYN1 and HDAC5 was increased in the presence of lenti-shTRPM2 in a dose-dependent manner (right) ( $n = 2$  per group, one-way ANOVA followed by Bonferroni posttest). Data are means  $\pm$  SEM.  $*p < 0.05$ . Other statistical parameters with significant differences are listed in Table S1.

**Figure S10. TRPM2 deficiency increases the expression of synaptic molecules in the hippocampus.** (A) Representative immunoblot images of hippocampal synaptic molecules. (B) Quantification of the immunoblots in A. SYN1, NR1, NR2B, GluR2 and Shank2 protein levels were elevated in the hippocampi of *Trpm2*<sup>-/-</sup> mice ( $n = 6$  to 8 per group, Student's t test). Data are means  $\pm$  SEM. \*\* $p < 0.01$ , \*\*\* $p < 0.001$ . Other statistical parameters with significant differences are listed in Table S1.

**Figure S11. Knockdown of Cdk5 increases PAR expression.** (A) Representative immunoblots of the lysates from mice hippocampal primary cultures infected with lenti-shCdk5 (left). Quantitative analysis showed Cdk5 deficiency increased PAR formation (right) ( $n = 2$  per group, student's  $t$  test). Data are means  $\pm$  SEM.  $*p < 0.05$ . Other statistical parameters with significant differences are listed in Table S1.



**Figure S12. Locomotor activities in lenti-shLuc- and lenti-shCdk5-infused mice.** (A) Average speed, (B) total distance travelled and (C) time in the center zone were scored in each 5 min period ( $n = 12$  to  $17$  per group). Disruption of Cdk5 expression in the DG did not have any effects on locomotor activities of *Trpm2*<sup>+/+</sup> and *Trpm2*<sup>-/-</sup> mice. Data are means  $\pm$  SEM.

**Figure S13. Knockdown of Cdk5 blocks antidepressant-like behaviors in *Trpm2*<sup>-/-</sup> mice under CUS.** (A) Timeline of the experimental procedures. (B) SCT. Knockdown of Cdk5 had no effect on sucrose consumption under CUS in either genotype ( $n = 6$  to 8 per group). (C) NSFT. Knockdown of Cdk5 increased latency to feed in *Trpm2*<sup>-/-</sup> mice under CUS ( $n = 6$  to 8 per group, unpaired two-tailed  $t$  test). (D) FST. Knockdown of Cdk5 increased immobility time in *Trpm2*<sup>-/-</sup> mice under CUS ( $n = 6$  to 8 per group, unpaired two-tailed  $t$  test). (E) LHT. Knockdown of Cdk5 increased escaped latency in *Trpm2*<sup>-/-</sup> mice under CUS ( $n = 6$  to 8 per group, unpaired two-tailed  $t$  test). (F) Average speed, (G) total distance travelled and (H) time in the center zone were scored in each 5 min period ( $n = 6$  to 8 per group). Disruption of Cdk5 expression in the DG did not have any effect on locomotor activity of *Trpm2*<sup>+/+</sup> and *Trpm2*<sup>-/-</sup> mice under CUS. Data are means  $\pm$  SEM. \* $p < 0.05$ , \*\* $p < 0.01$ , \*\*\* $p < 0.001$ . Other statistical parameters are listed in Table S1.

**Figure S14. Schematic diagram**

Chronic stress-induced increases in ROS lead to activation of DNA repair enzyme, PARP, resulting in the production of TRPM2 activator, ADPR. TRPM2-dependent calcium influx causes calpain activation, aberrant hyperactivation of Cdk5, and impaired ROS scavenging system; this in turn leads to accumulation of ROS and provides an autoregulatory feed-forward loop.

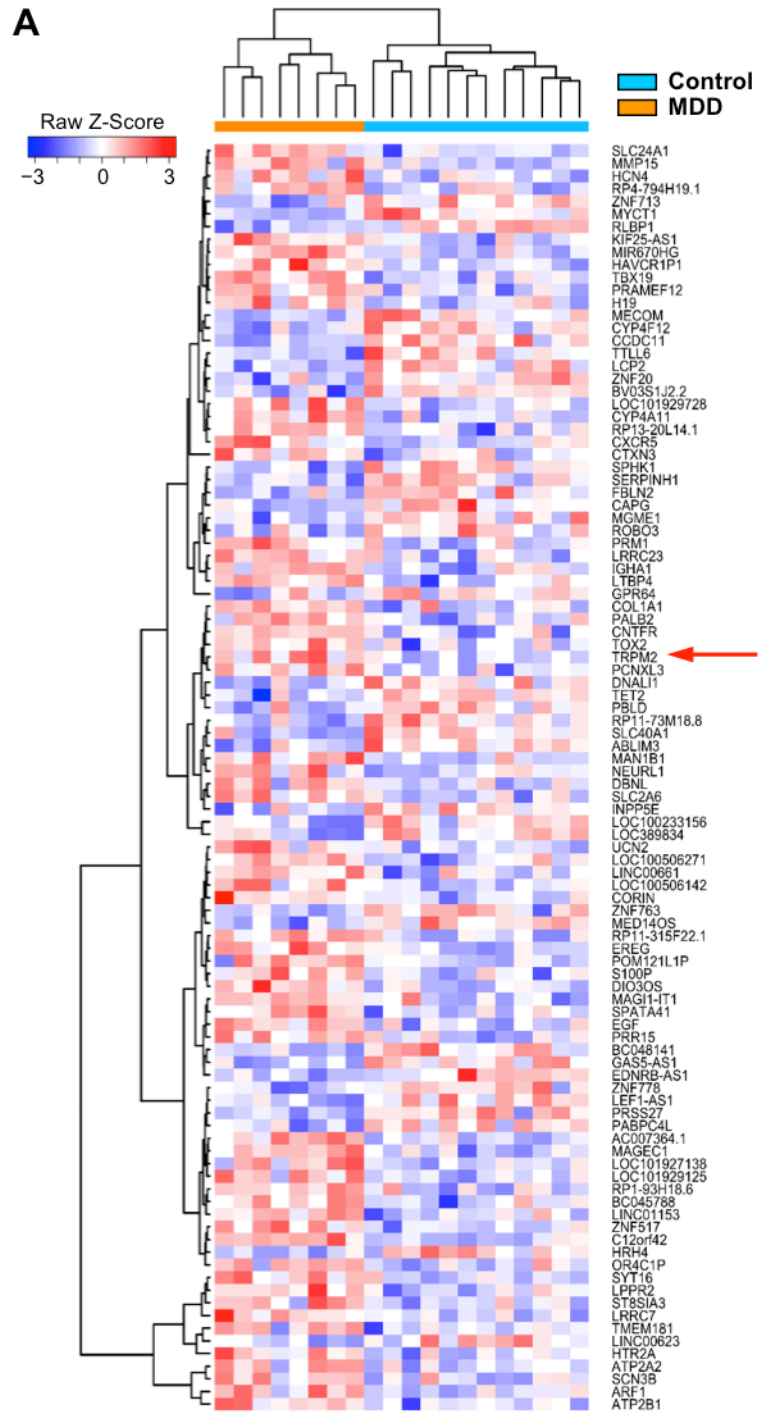

**B**

| Symbol | up/down | logFC | P-Value |
|--------|---------|-------|---------|
| TRPM2  | up      | 0.21  | 0.004   |
| TRPM7  | down    | -0.04 | 0.755   |
| TRPA1  | up      | 0.03  | 0.713   |
| TRPC3  | down    | -0.02 | 0.826   |
| TRPC5  | up      | 0.16  | 0.077   |

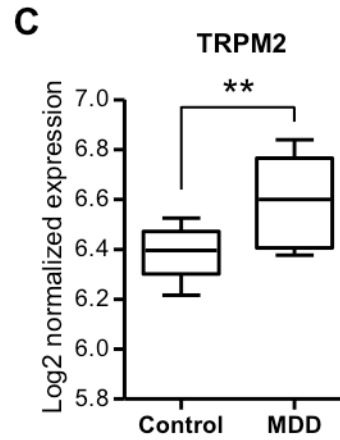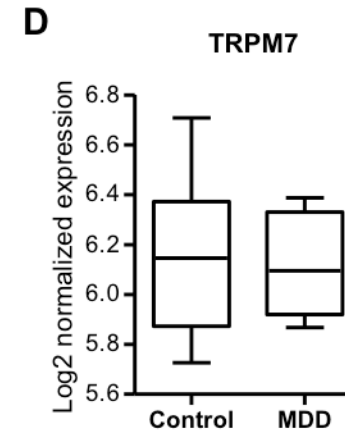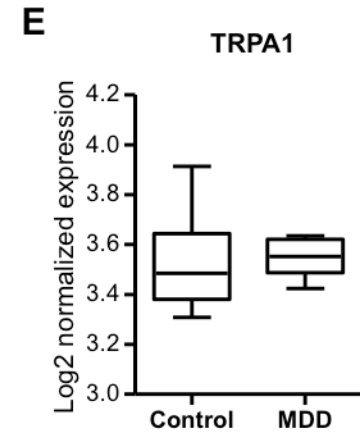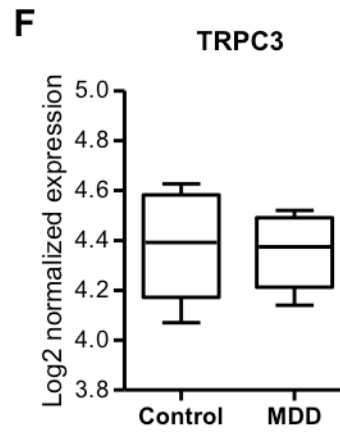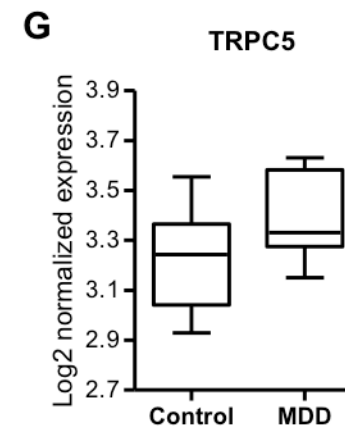

Figure S1

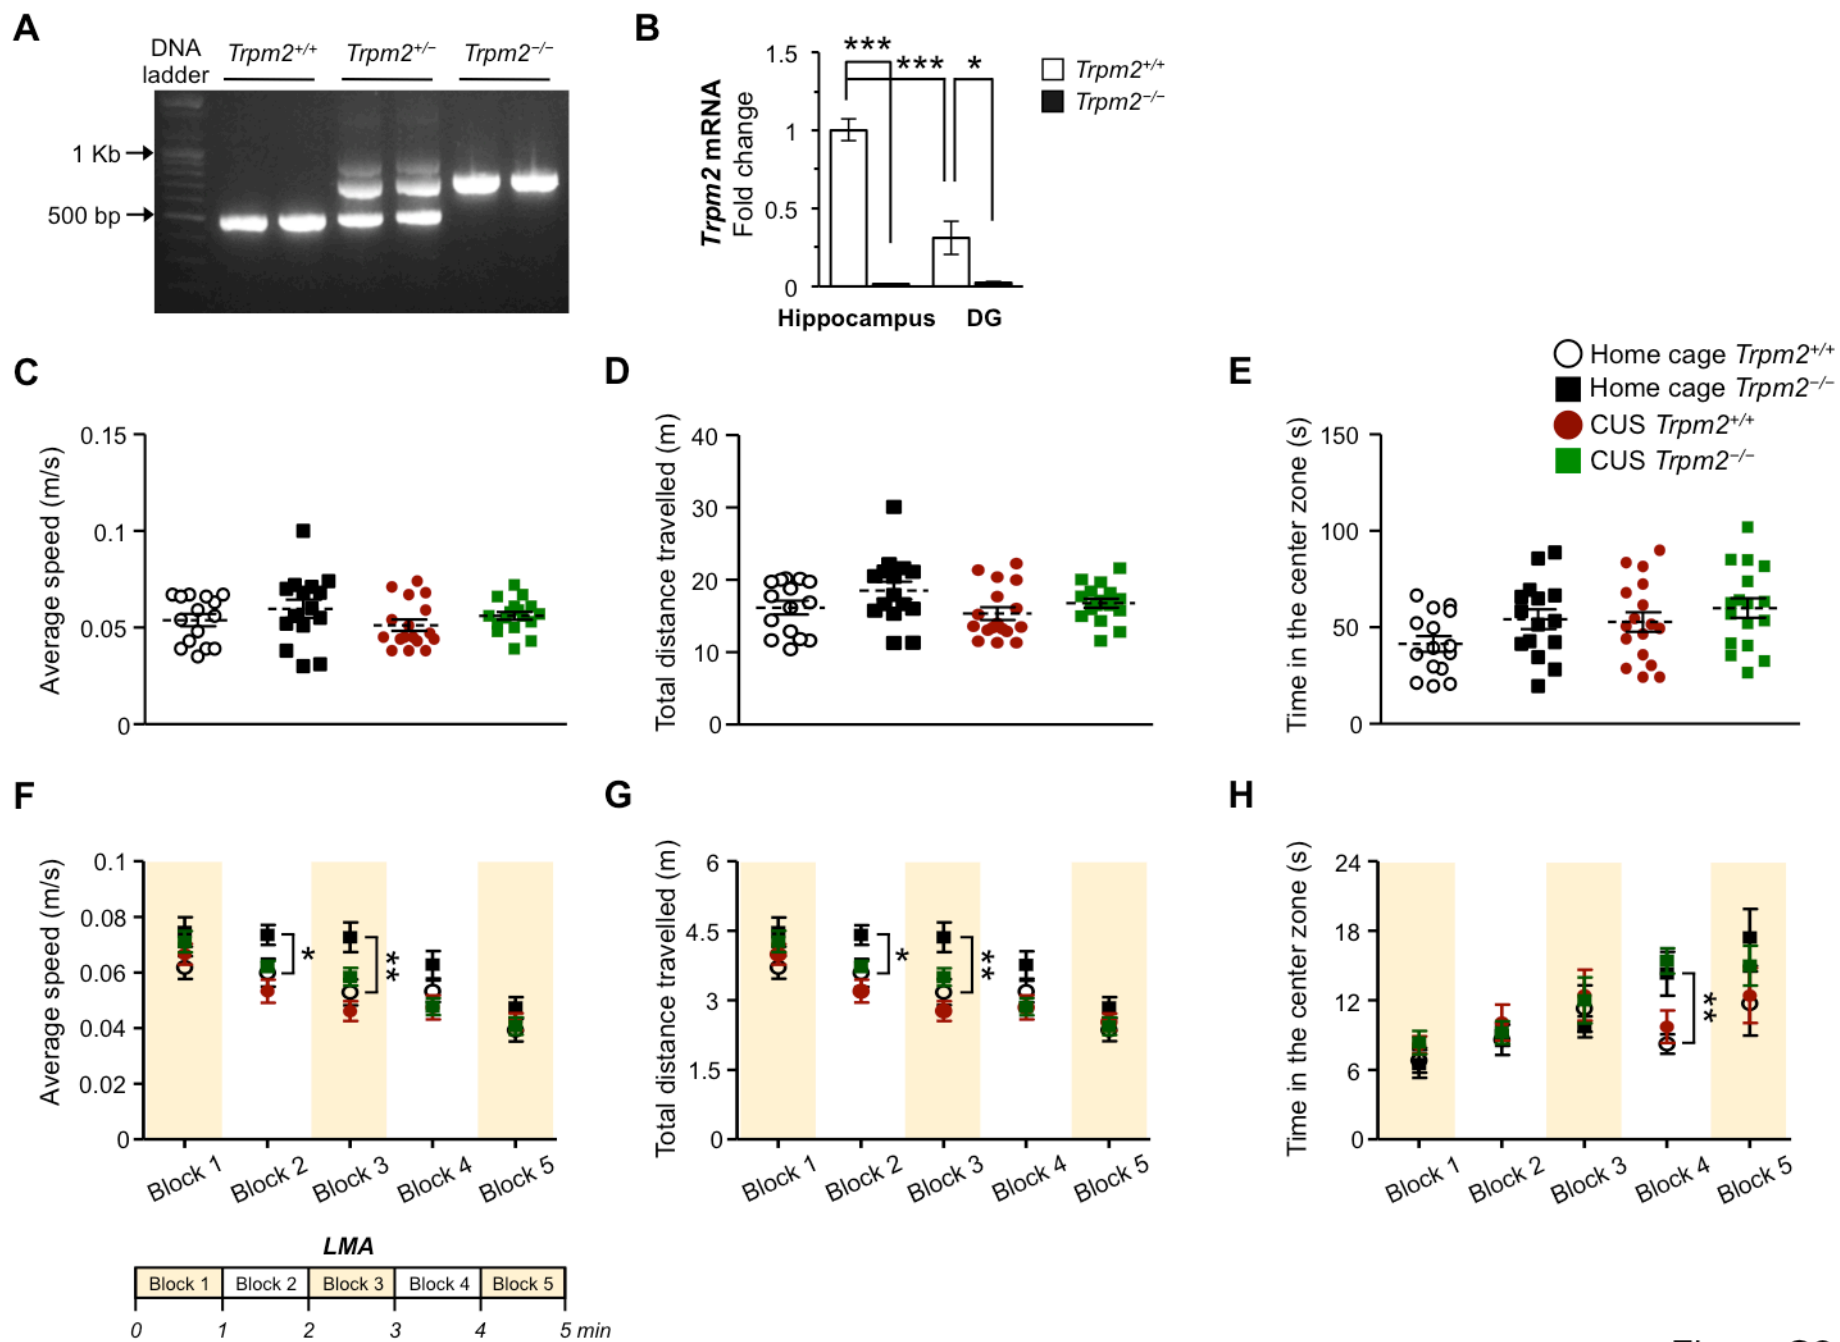

Figure S2

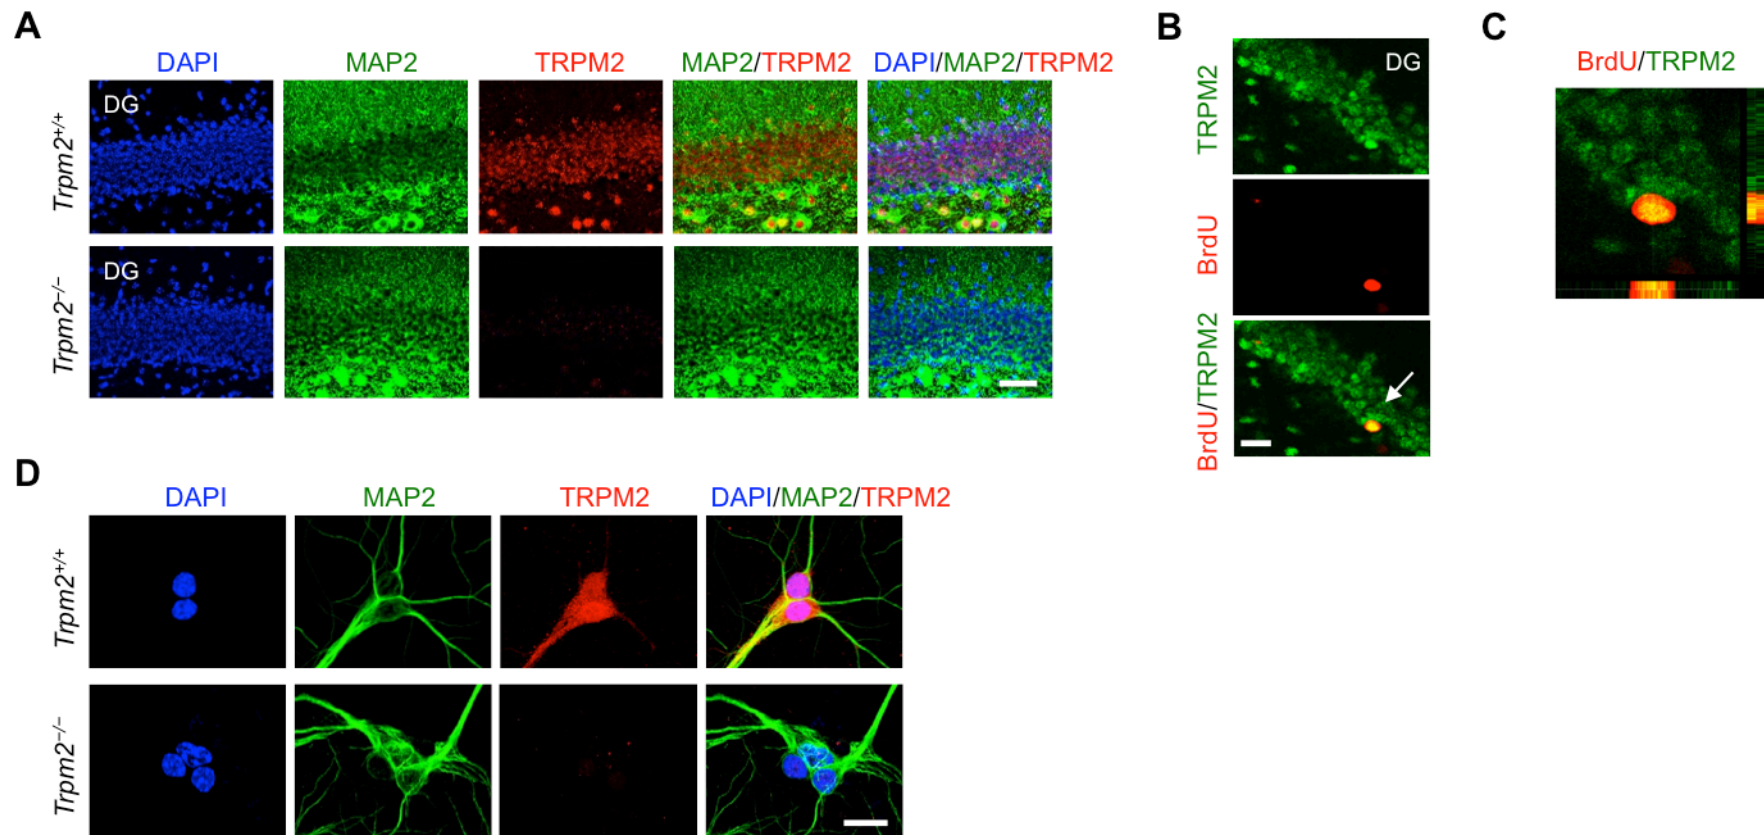

Figure S3

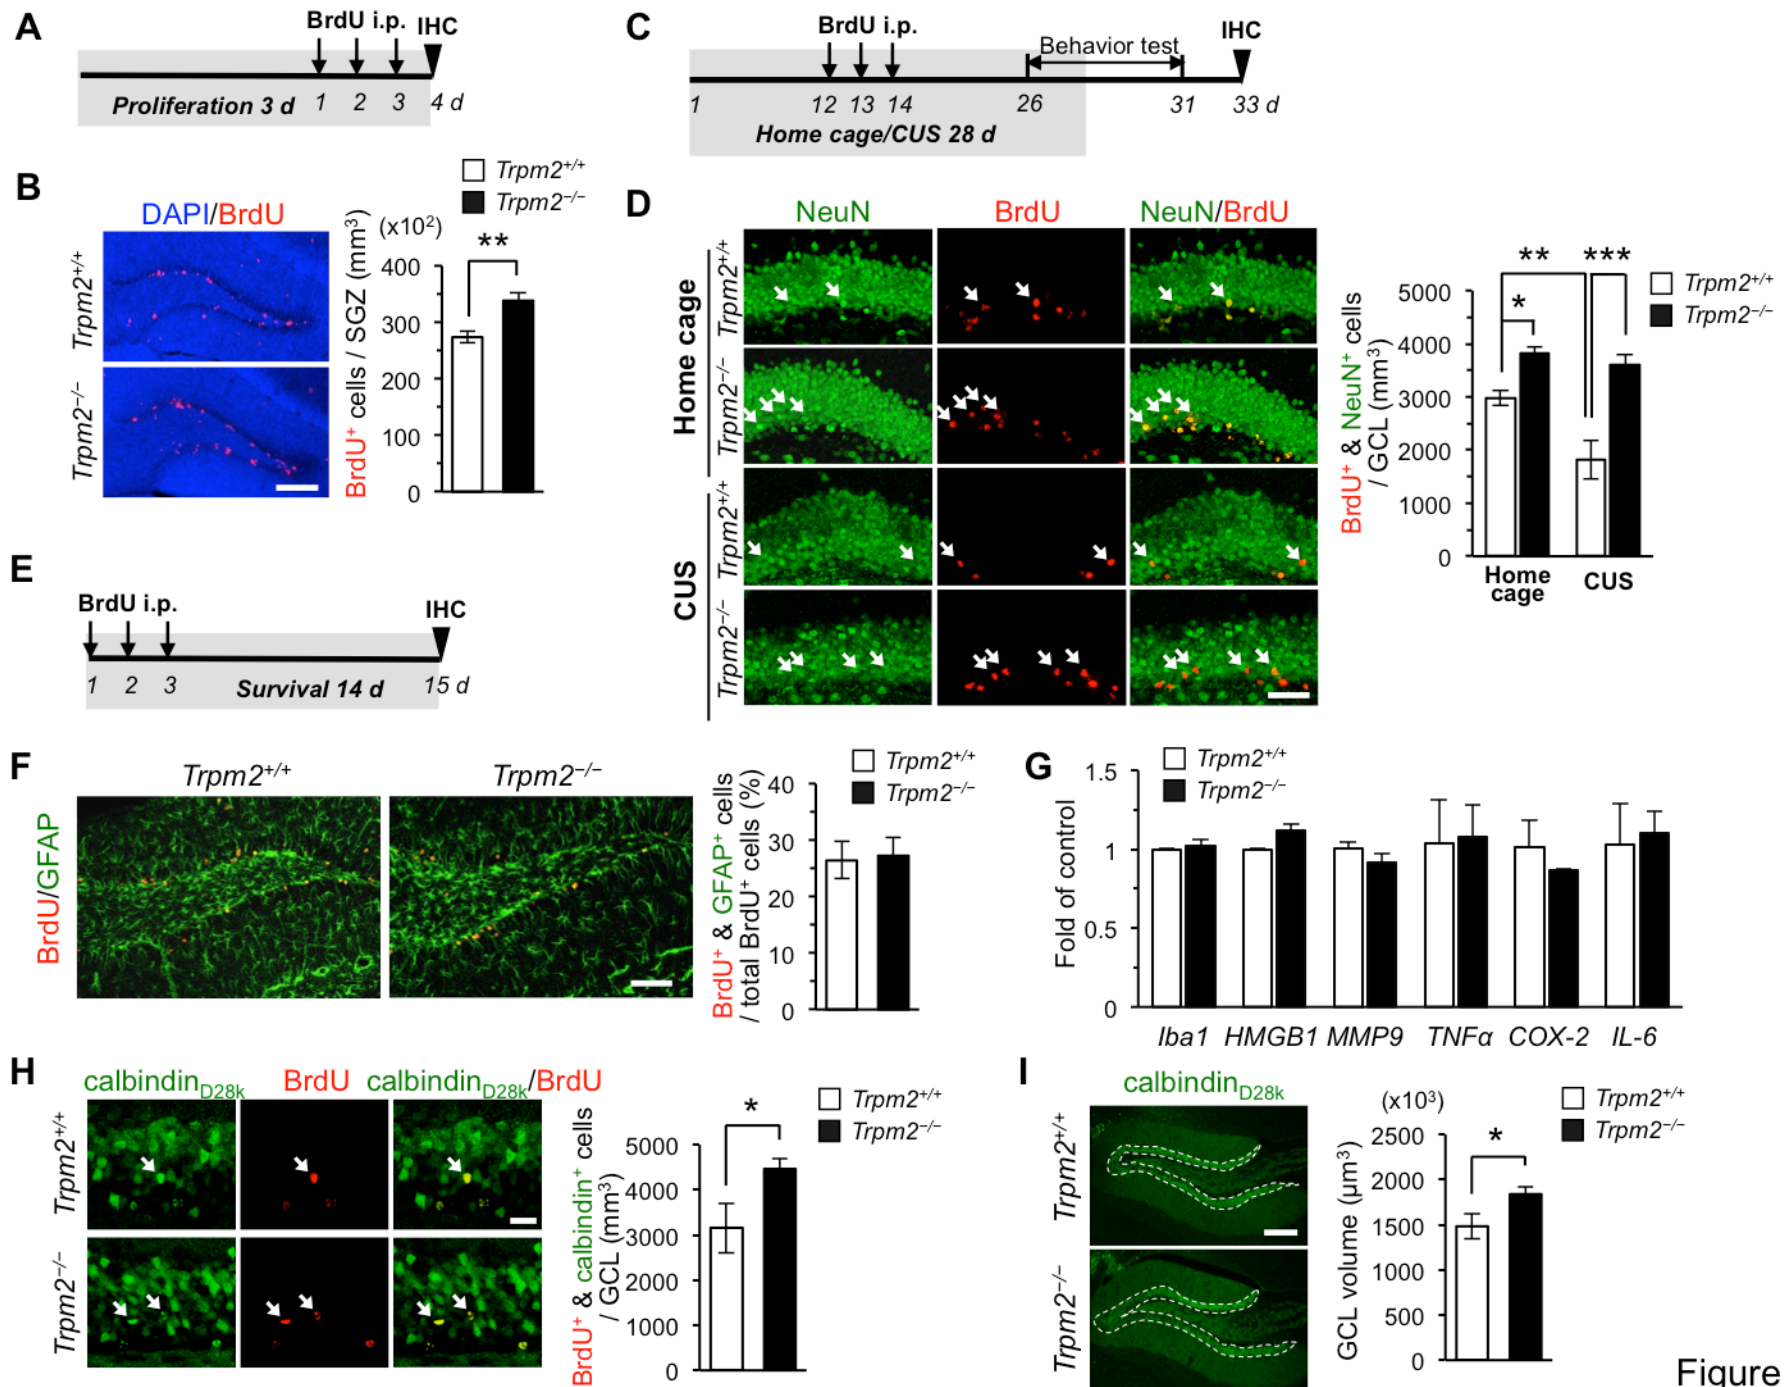

Figure S4

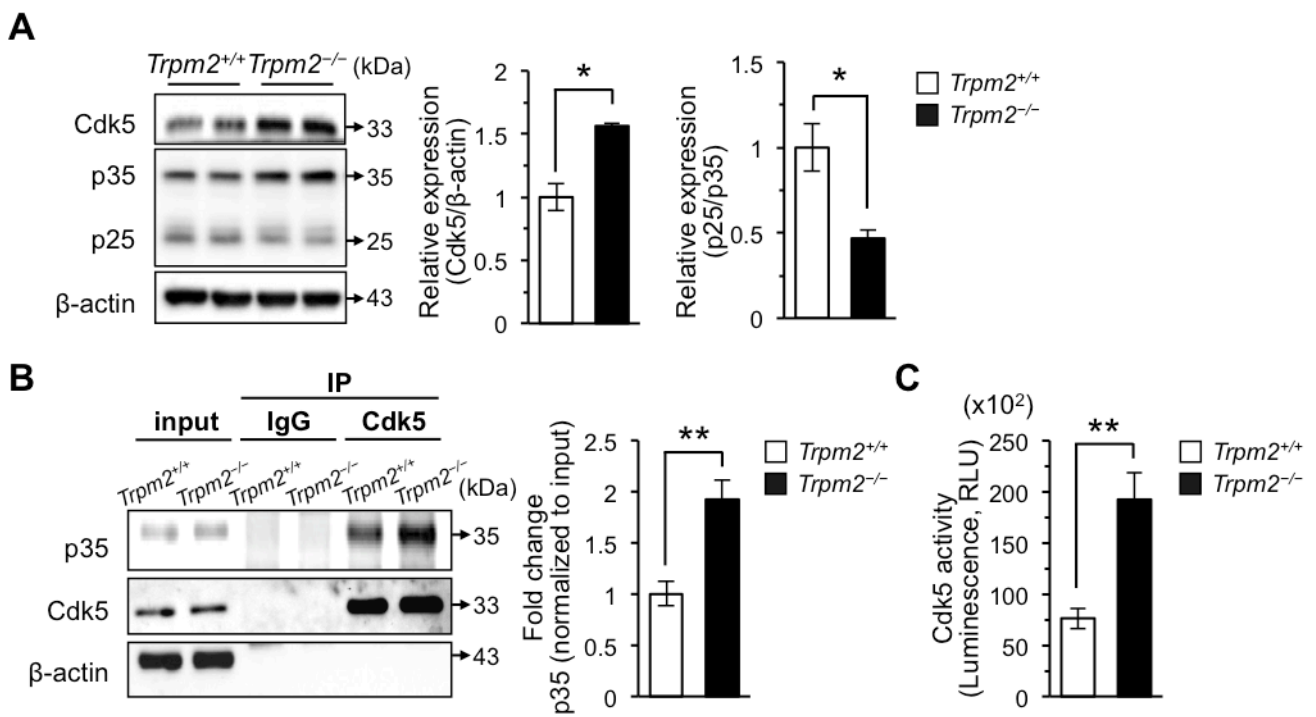

Figure S5



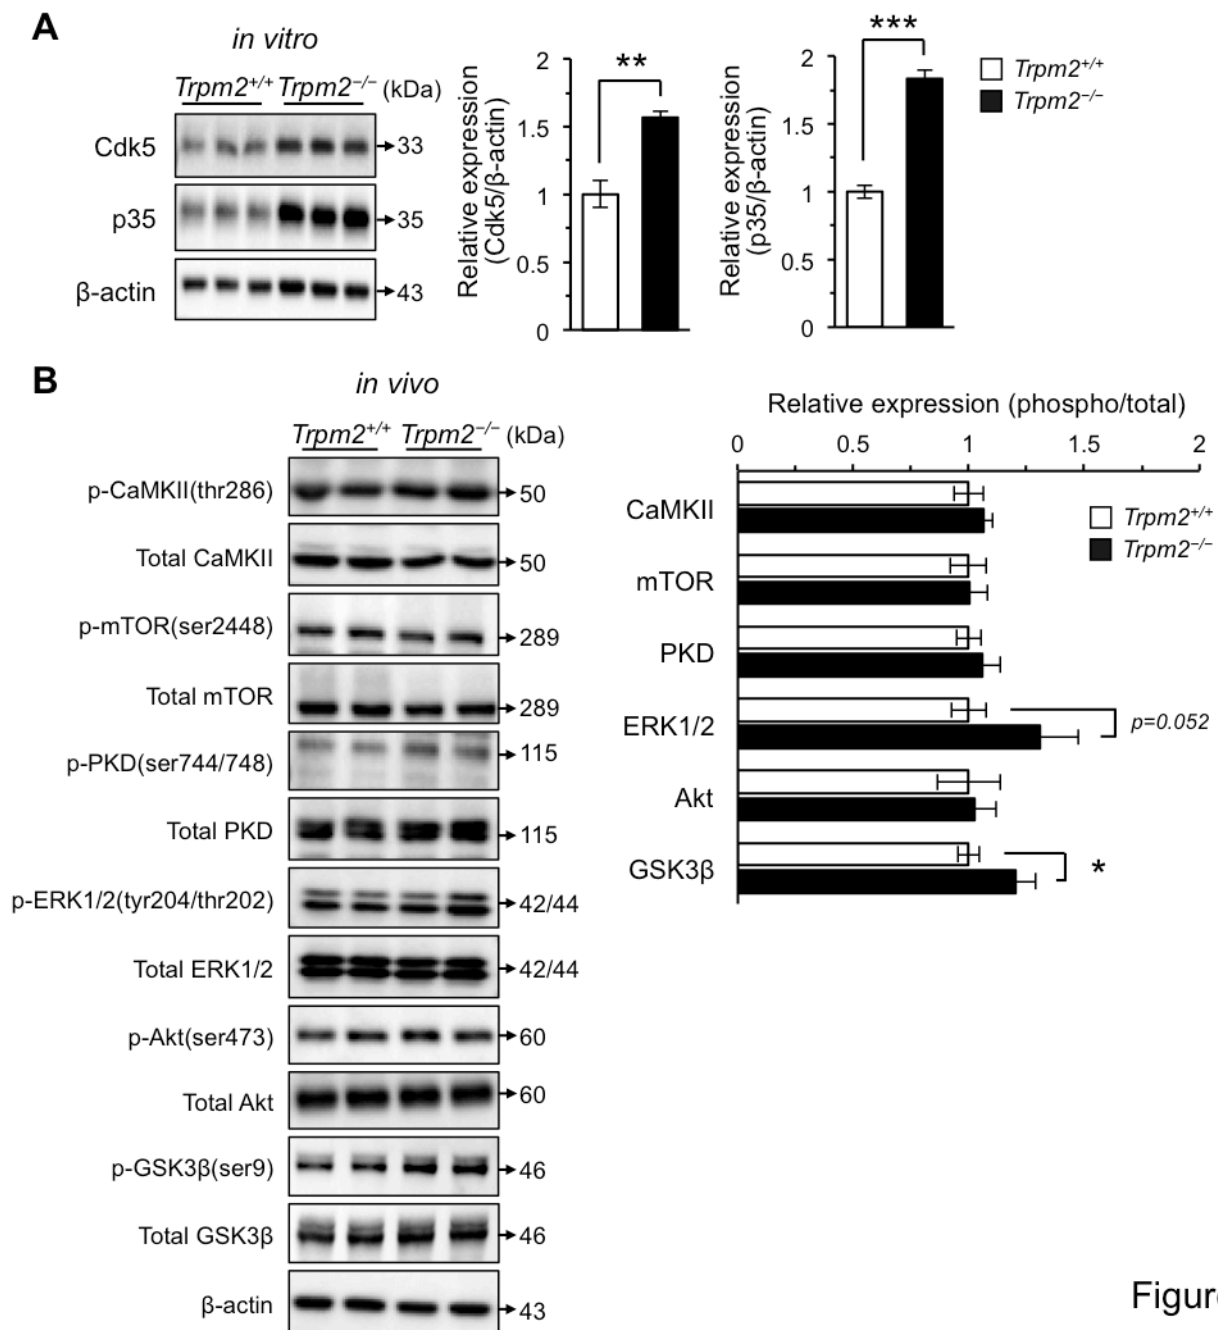

Figure S6

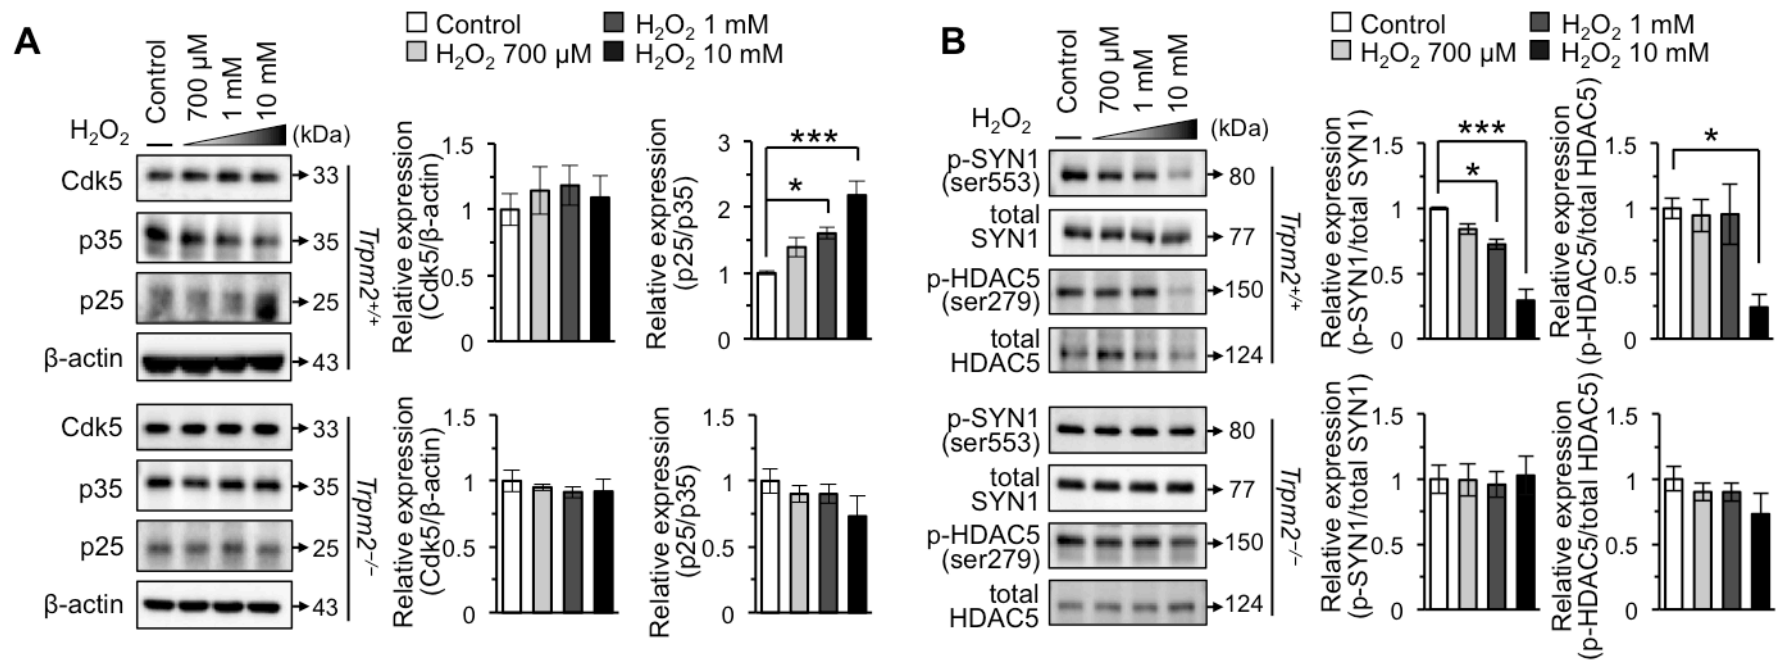

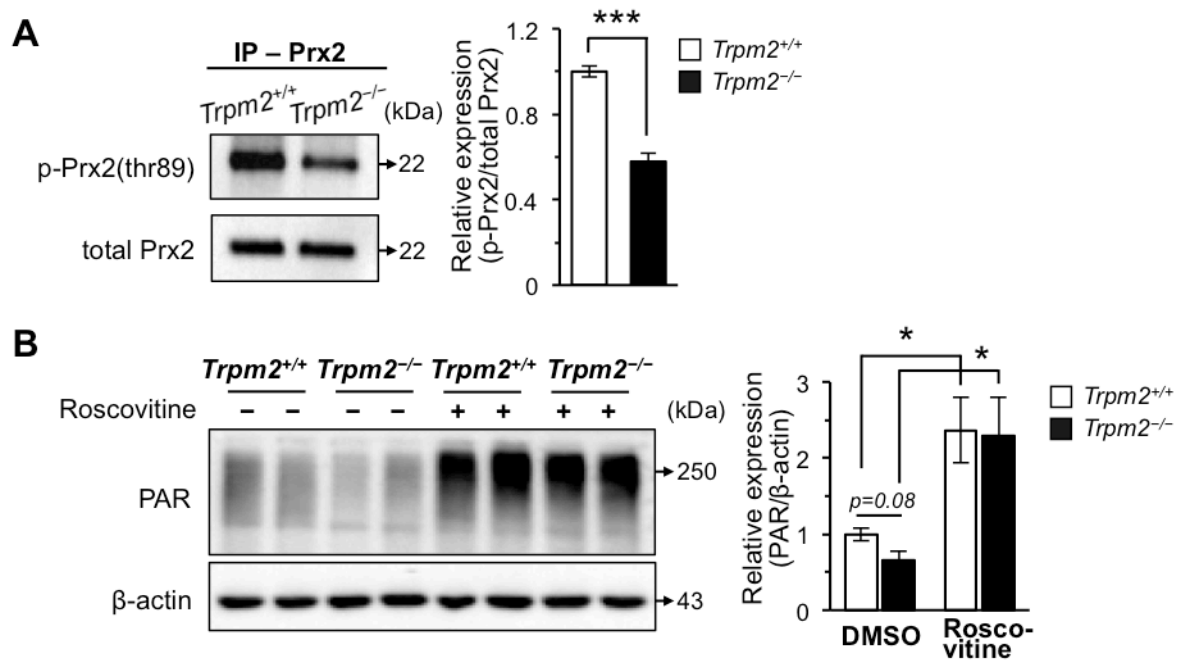

Figure S8

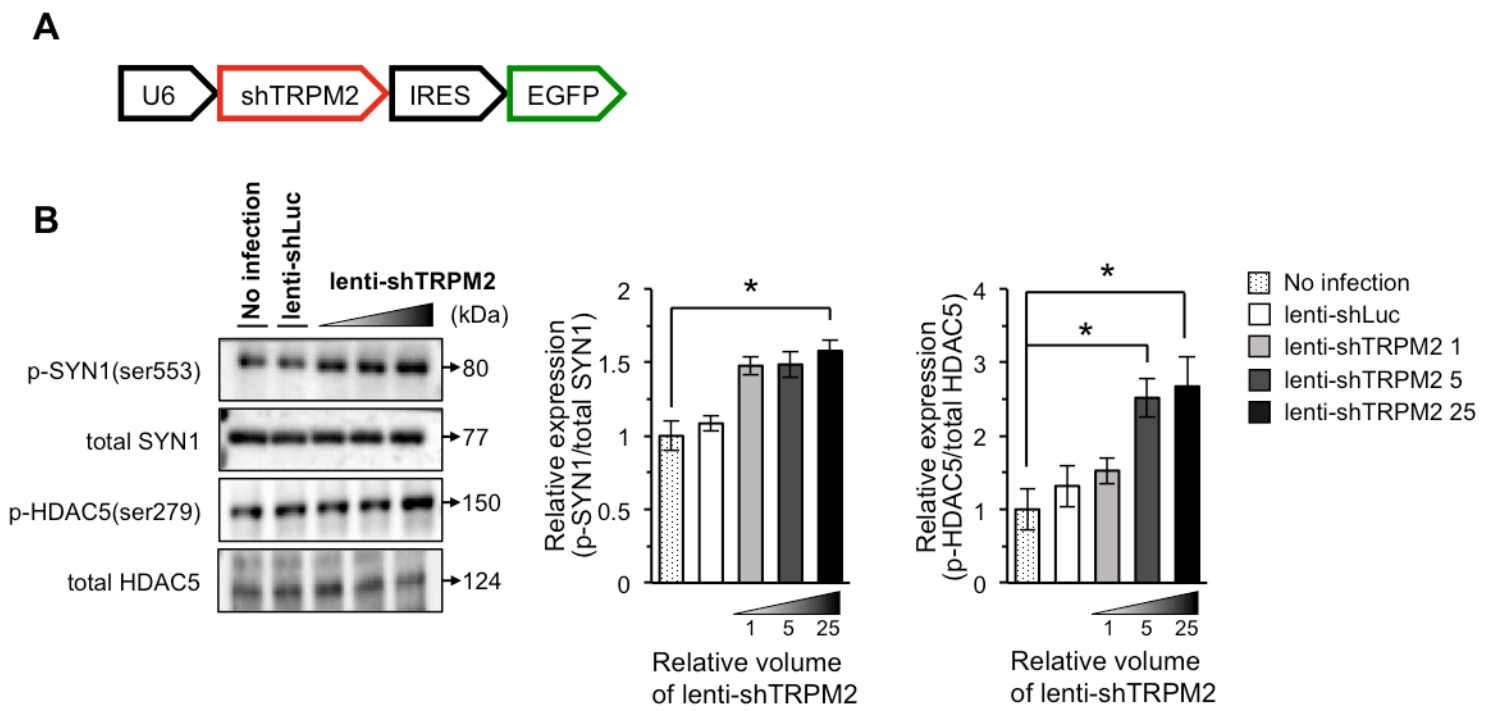

Figure S9

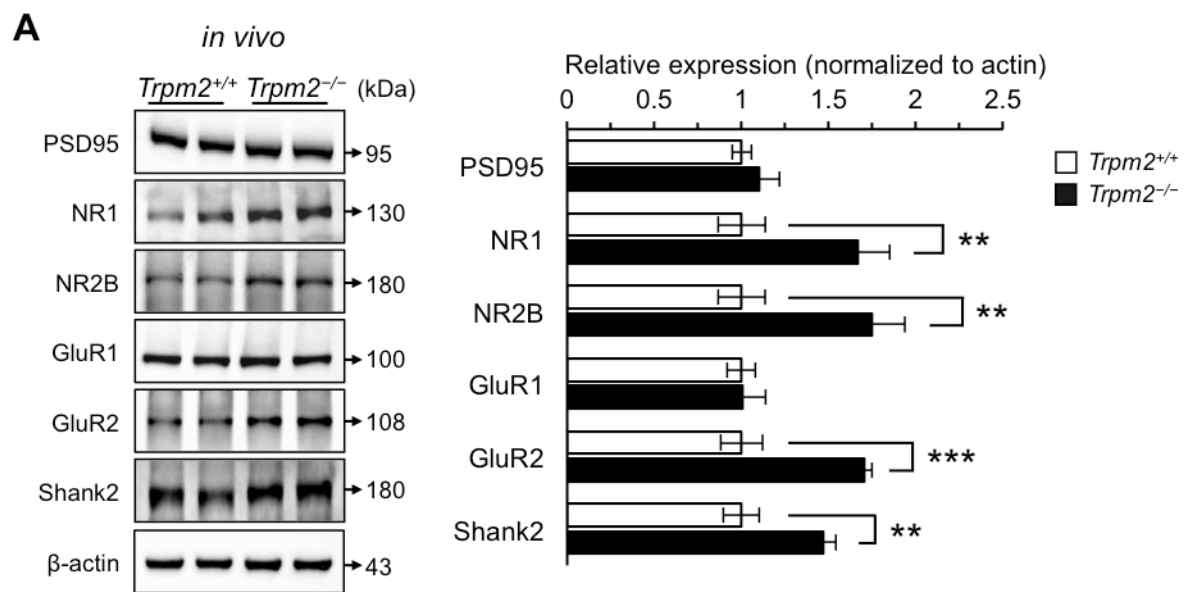

Figure S10

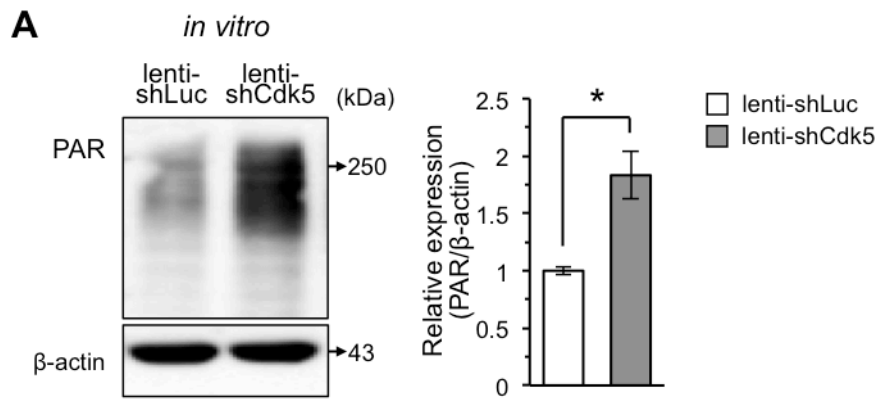

Figure S11

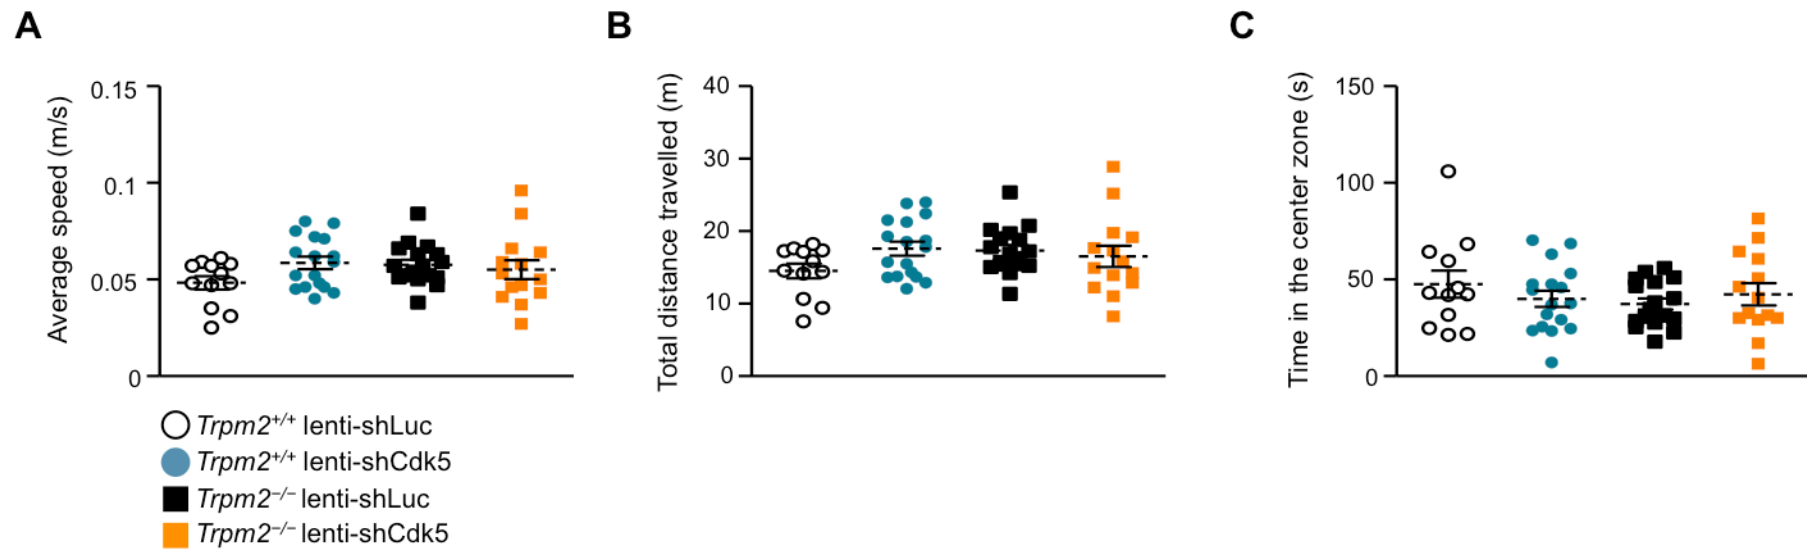

Figure S12

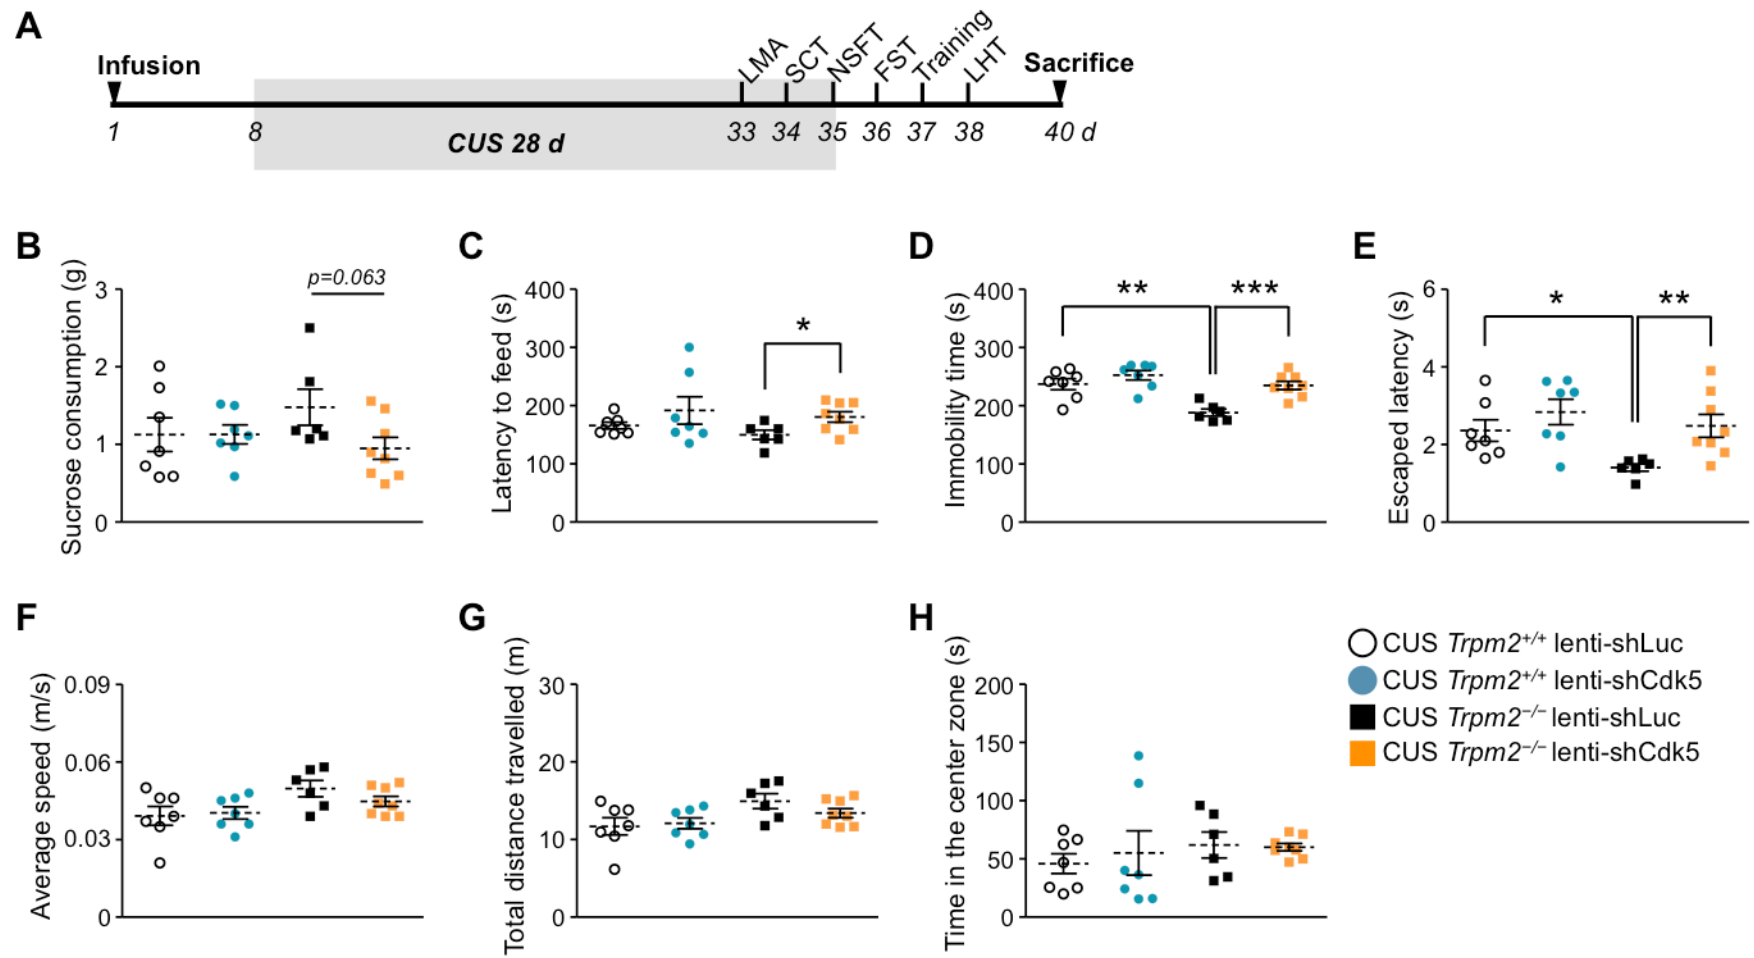

Figure S13



# Schematic diagram

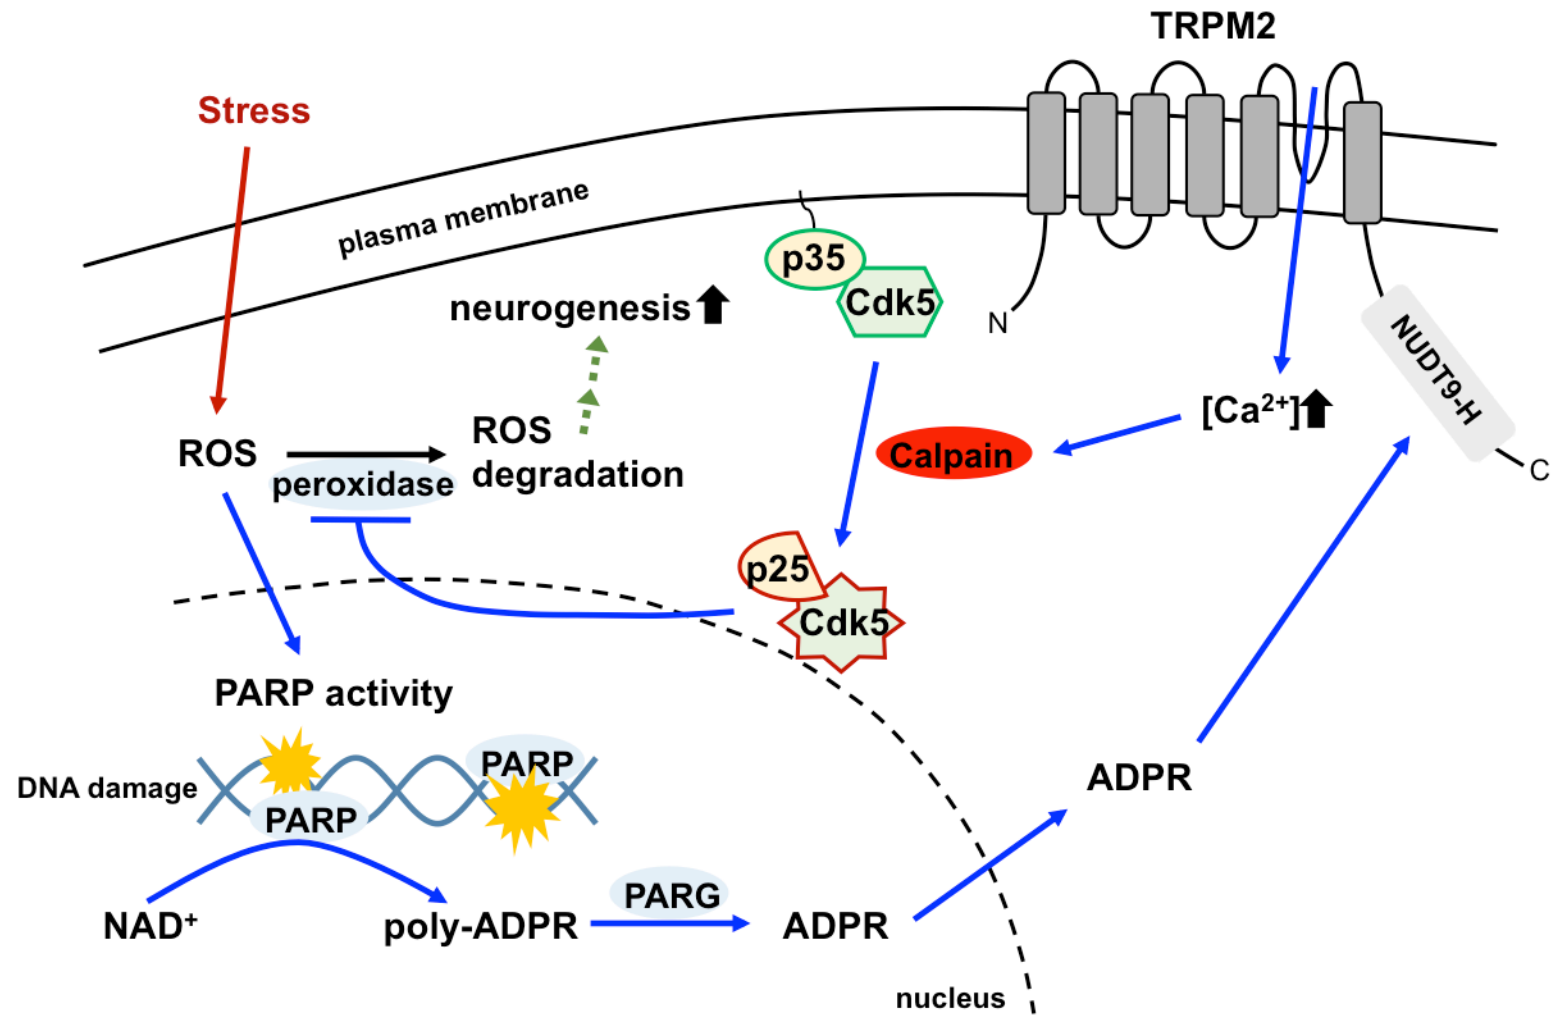

Figure S14
